# Supplementary material for: Comparison of efficacy discrepancy between early-phase clinical trials and phase III trials of PD-1/PD-L1 inhibitors
Source: HighWire-hosted journal article supplement (doi:10.1136/jitc-2023-007959), 2024-01-01
Supplement: jitc-2023-007959supp001_data_supplement.pdf [file jitc-2023-007959supp001_data_supplement.pdf]

Supplementary Table 1. ORRs and assessing criteria of clinical trials included in the analysis

| Regimen       | Cancer Type       | Line | Biomarker          | study                        |             |                    |                       |                                  |             |                    |                      |
|---------------|-------------------|------|--------------------|------------------------------|-------------|--------------------|-----------------------|----------------------------------|-------------|--------------------|----------------------|
|               |                   |      |                    | Phase2                       | Phase 2 ORR | N(Responder/total) | assessing criteria    | Phase3                           | Phase 3 ORR | N(Responder/total) | assessing criteria   |
| Atezolizumab  | NSCLC             | 2L   | TC1/2/3 or IC1/2/3 | (Fehrenbacher et al., 2016)  | 38%         | 55/144             | RECIST v1.1           | (Rittmeyer et al., 2017)         | 14%         | 60/425             | RECIST v1.1          |
| Atezolizumab  | NSCLC             | 1L   | TC2/3              | (Peters et al., 2017)        | 22%         | 31/142             | RECIST v1.1           | (Herbst et al., 2020)            | 31%         | 85/277             | RECIST v1.1          |
| Atezolizumab  | Bladder cancer    | 2L   | TC2/3              | (Rosenberg et al., 2016)     | 27%         | 84/310             | RECIST v1.1, imRECIST | (Powles et al., 2018)            | 23%         | 107/467            | RECIST v1.1          |
| Avelumab      | NSCLC             | 2L   | PD-L1(1%)          | (Gulley et al., 2017)        | 25%         | 46/184             | RECIST v1.1           | (Barlesi et al., 2018)           | 19%         | 75/396             | RECIST v1.1          |
| Avelumab      | NSCLC             | 2L   | PD-L1(50%)         | (Gulley et al., 2017)        | 33%         | 61/184             | RECIST v1.1           | (Barlesi et al., 2018)           | 26%         | 103/396            | RECIST v1.1          |
| Avelumab      | NSCLC             | 2L   | PD-L1(80%)         | (Gulley et al., 2017)        | 43%         | 79/184             | RECIST v1.1           | (Barlesi et al., 2018)           | 31%         | 123/396            | RECIST v1.1          |
| Avelumab      | Ovarian cancer    | 2L   | PD-L1              | (Disis et al., 2019)         | 10%         | 12/125             | RECIST v1.1, irRECIST | (Pujade-Lauraine et al., 2021)   | 4%          | 8/188              | RECIST v1.1,         |
| Camrelizumab  | Esophageal cancer | 2L   | PD-L1              | (Huang et al., 2018)         | 33%         | 10/30              | RECIST v1.1           | (Huang et al., 2020)             | 20%         | 46/228             | RECIST v1.1          |
| Nivolumab     | NSCLC             | 2L   | PD-L1              | (Rizvi et al., 2015)         | 15%         | 17/117             | RECIST v1.1           | (Brahmer et al., 2015)           | 20%         | 27/135             | RECIST v1.1          |
| Nivolumab     | NSCLC             | 2L   | PD-L1>5%           | (Gettinger et al., 2016)     | 50%         | 26/52              | RECIST v1.1           | (Carbone et al., 2017)           | 26%         | 70/271             | RECIST v1.1          |
| Nivolumab     | Melanoma          | 2L   | PD-L1              | (Topalian et al., 2012)      | 31%         | 32/104             | RECIST v1.0           | (Larkin et al., 2018)            | 27%         | 73/272             | RECIST v1.1          |
| Nivolumab     | Glioblastoma      | 2L   | /                  | (Omuro et al., 2018)         | 11%         | 1/10               | RANO                  | (Reardon et al., 2020)           | 8%          | 14/184             | RANO                 |
| Nivolumab     | Ovarian Cancer    | 2L   | PD-L1              | (Hamanishi et al., 2015)     | 15%         | 3/20               | RECIST v1.1           | (Hamanishi et al., 2021)         | 8%          | 12/157             | RECIST v1.1          |
| Nivolumab     | Esophageal cancer | 2L   | PD-L1              | (Kudo et al., 2017)          | 17%         | 11/65              | RECIST v1.1           | (Kato et al., 2019)              | 19%         | 40/210             | RECIST v1.1          |
| Nivolumab     | RCC               | 2L   | PD-L1              | (Motzer, Rini, et al., 2015) | 22%         | 37/168             | RECIST v1.1           | (Motzer, Escudier, et al., 2015) | 25%         | 103/410            | RECIST v1.1          |
| Nivolumab     | Gastric cancer    | 2L   | PD-L1              | (Janjigian et al., 2018)     | 12%         | 7/59               | RECIST v1.1           | (Kang et al., 2017)              | 11%         | 37/330             | RECIST v1.1          |
| Nivolumab     | MPM               | 2L   | PD-L1              | (Okada et al., 2019)         | 29%         | 10/34              | RECIST v1.1, mRECIST  | (Fennell et al., 2021)           | 11%         | 24/221             | RECIST v1.1, mRECIST |
| Pembrolizumab | HL                | HSCT | PD-L1              | (Chen et al., 2017)          | 72%         | 151/210            | RRC                   | (Kuruvilla et al., 2021)         | 66%         | 99/151             | RRC                  |
| Pembrolizumab | TNBC              | 2L   | PD-L1              | (Nanda et al., 2016)         | 19%         | 21/111             | RECIST v1.1           | (Winer et al., 2021)             | 10%         | 30/312             | RECIST v1.1          |

|                                               |                      |    |                 |                           |     |        |               |                               |     |         |                       |
|-----------------------------------------------|----------------------|----|-----------------|---------------------------|-----|--------|---------------|-------------------------------|-----|---------|-----------------------|
| Pembrolizumab                                 | HNSCC                | 2L | PD-L1           | (Seiwert et al., 2016)    | 16% | 10/60  | RECIST v1.1   | (Cohen et al., 2019)          | 15% | 36/247  | RECIST v1.1, imRECIST |
| Pembrolizumab                                 | Gastric cancer       | 1L | PD-L1 $\geq$ 1% | (Bang et al., 2019)       | 26% | 8/31   | RECIST v1.1   | (Shitara et al., 2020)        | 15% | 38/256  | RECIST v1.1           |
| Pembrolizumab                                 | Bladder cancer       | 2L | PD-L1           | (Taylor et al., 2020)     | 31% | 43/137 | RECIST v1.1   | (Y.Loriot et al., 2022)       | 25% | 55/218  | RECIST v1.1           |
| Cemiplimab                                    | Cervix cancer        | 2L | PD-L1           | (Rischin et al., 2020)    | 17% | 2/10   | RECIST v1.1   | (Tewari et al., 2022)         | 16% | 50/304  | RECIST v1.1           |
| Avelumab+Axitinib                             | RCC                  | 1L | PD-L1           | (Choueiri et al., 2018)   | 66% | 36/55  | RECIST v1.1   | (Motzer et al., 2019)         | 55% | 244/442 | RECIST v1.1           |
| Atezolizumab+bevacizumab                      | RCC                  | 1L | PD-L1           | (McDermott et al., 2018)  | 64% | 65/101 | RECIST v1.1   | (Rini, Powles, et al., 2019)  | 47% | 213/454 | RECIST v1.1           |
| Atezolizumab+Chemotherapy                     | NSCLC                | 1L | /               | (Liu et al., 2017)        | 46% | 12/25  | RECIST v1.1   | (Nishio et al., 2021)         | 43% | 126/292 | RECIST v1.1           |
| Atezolizumab+Paclitaxel(Albumin bound)        | TNBC                 | 1L | PD-L1           | (Adams et al., 2019)      | 41% | 14/33  | RECIST v1.1   | (Schmid et al., 2018)         | 59% | 266/451 | RECIST v1.1           |
| Gemcitabine+cisplatin+durvalumab+tremelimumab | Biliary tract cancer | 1L | PD-L1           | (Oh et al., 2022)         | 72% | 89/124 | irRECIST      | (Oh D-Y, 2022)                | 26% | 89/341  | RECIST v1.1           |
| Camrelizumab+rivoceranib                      | HCC                  | 1L | PD-L1           | (Xu, Shen, et al., 2021)  | 34% | 65/190 | RECIST v1.1   | (Qin et al., 2022)            | 25% | 69/272  | RECIST v1.1           |
| Atezolizumab+Cobimetinib                      | Melanoma             | 1L | PD-L1/BRAF      | (Hellmann et al., 2019)   | 41% | 62/150 | RECIST v1.1   | (Gogas et al., 2021)          | 26% | 58/222  | RECIST v1.1           |
| Atezolizumab+Cobimetinib                      | CRC                  | 3L | PD-L1/BRAF/RAS  | (Hellmann et al., 2019)   | 8%  | 12/150 | RECIST v1.1   | (Eng et al., 2019)            | 3%  | 5/183   | RECIST v1.1           |
| Nivolumab+bempegaldesleukin                   | Melanoma             | 1L | PD-L1/BRAF      | (Diab et al., 2021)       | 53% | 22/41  | RECIST v1.1   | (Diab, 2022)                  | 28% | 108/391 | RECIST v1.1           |
| Nivolumab+bempegaldesleukin                   | RCC                  | 1L | PD-L1           | (Tannir et al., 2022)     | 35% | 17/49  | RECIST v1.1   | (Nizar Tannir, 2022)          | 23% | 118/514 | RECIST v1.1           |
| Pembrolizumab+talinogene laherparepvec        | Melanoma             | 2L | /               | (G. V. Long et al., 2016) | 62% | 16/25  | RECIST v1.1   | (Chesney et al., 2023)        | 49% | 168/346 | irRECIST              |
| Pembrolizumab+Axitinib                        | RCC                  | 1L | PD-L1           | (Atkins et al., 2018)     | 73% | 38/52  | RECIST v1.1   | (Rini, Plimack, et al., 2019) | 59% | 256/432 | RECIST v1.1           |
| Pembrolizumab+Epacadostat                     | Melanoma             | 1L | PD-L1/IDO1      | (Mitchell et al., 2018)   | 56% | 35/62  | RECIST v1.1   | (Long et al., 2019)           | 34% | 121/354 | RECIST v1.1           |
| Pembrolizumab+Chemotherapy                    | TNBC                 | 1L | PD-L1 $\geq$ 1% | (Chun et al., 2022)       | 43% | 6/14   | RECIST v1.1   | (Cortes et al., 2020)         | 53% | 114/215 | RECIST v1.1           |
| Pembrolizumab+Chemotherapy                    | Gastric cancer       | 1L | PD-L1           | (Bang et al., 2019)       | 60% | 15/25  | RECIST v1.1   | (Shitara et al., 2020)        | 49% | 126/257 | RECIST v1.1           |
| Pembrolizumab+Lenvatinib                      | HCC                  | 1L | AFP             | (Finn et al., 2020)       | 36% | 36/100 | RECIST v1.1   | (Finn, 2022)                  | 26% | 103/395 | RECIST v1.1           |
| Lenvatinib+Pembrolizumab                      | endometrial cancer   | 1L | MSI-H/dMMR      | (Makker et al., 2020)     | 64% | 7/11   | RECIST v1.1   | (Makker et al., 2022)         | 40% | 26/45   | RECIST v1.1           |
| Pembrolizumab+pomalido                        | MM                   | 3L | PD-L1/CD3       | (Badros et al., 2020)     | 60% | 29/48  | International | (Mateos et al., 2020)         | 34% | 43/125  | International         |

| midе+dexamethasone                   |                    |    |                  | 2017)                    |     |        | Myeloma Working Group criteria | 2019)                       |     |         | Myeloma Working Group criteria |
|--------------------------------------|--------------------|----|------------------|--------------------------|-----|--------|--------------------------------|-----------------------------|-----|---------|--------------------------------|
| Pembrolizumab+Dabrafenib+trametinib  | Melanoma           | 1L | PD-L1/BRAF       | (Ascierto et al., 2019)  | 78% | 47/60  | RECIST v1.1                    | (Dummer et al., 2022)       | 69% | 184/267 | RECIST v1.1                    |
| Pembrolizumab+trastuzumab            | Gastric cancer     | 1L | PD-L1/HER2       | (Janjigian et al., 2020) | 91% | 34/37  | RECIST v1.1                    | (Janjigian & Kawazoe, 2021) | 74% | 161/217 | RECIST v1.1                    |
| Durvalumab+Tremelimumab+Chemotherapy | NSCLC              | 1L | PD-L1<br>TC <25% | (Antonia et al., 2016)   | 23% | 23/102 | RECIST v1.1                    | (Planchard et al., 2020)    | 15% | 26/174  | RECIST v1.1                    |
| Atezolizumab+cobimetinib+vemurafenib | Melanoma           | 1L | PD-L1/BRAF       | (Sullivan et al., 2019)  | 72% | 95/133 | RECIST v1.1                    | (Gutzmer et al., 2020)      | 66% | 164/247 | RECIST v1.1                    |
| Sintilimab+IBI305                    | HCC                | 1L | α-fetoprotein    | (Ren et al., 2021)       | 25% | 9/37   | RECIST v1.1,<br>mRECIST        | (Ren et al., 2021)          | 24% | 91/380  | RECIST v1.1,<br>mRECIST        |
| Sintilimab+chemotherapy              | NSCLC-Squamous     | 1L | PD-L1            | (Jiang et al., 2021)     | 65% | 27/41  | RECIST v1.1                    | (Zhou et al., 2021)         | 45% | 80/179  | RECIST v1.1                    |
| Sintilimab+chemotherapy              | NSCLC-Non Squamous | 1L | PD-L1            | (Jiang et al., 2021)     | 68% | 28/41  | RECIST v1.1                    | (Yang et al., 2020)         | 52% | 138/266 | RECIST v1.1                    |
| Oxaliplatin+Sintilimab+Capecitabine  | Gastric cancer     | 1L | PD-L1            | (Jiang et al., 2020)     | 85% | 17/20  | RECIST v1.1                    | (Xu, Jiang, et al., 2021)   | 65% | 213/327 | RECIST v1.1                    |
| Nivolumab+Ipilimumab                 | NSCLC              | 1L | PD-L1            | (Hellmann et al., 2017)  | 48% | 37/77  | RECIST v1.1                    | (Hellmann et al., 2018)     | 36% | 50/139  | RECIST v1.1                    |
| Ipilimumab+Nivolumab                 | Melanoma           | 1L | PD-L1/BRAF       | (Hodi et al., 2016)      | 61% | 58/95  | RECIST v1.1                    | (Larkin et al., 2015)       | 58% | 181/314 | RECIST v1.1                    |

Supplement Table 2 Table of primary endpoints and week intervals for tumor assessment of clinical trials included in the analysis

| Regimen      | Cancer Type       | study                       |                  |                                                            |                                |                  |                                                            |
|--------------|-------------------|-----------------------------|------------------|------------------------------------------------------------|--------------------------------|------------------|------------------------------------------------------------|
|              |                   | Phase2                      | Primary Endpoint | Intervals for tumor assessment                             | Phase3                         | Primary Endpoint | Intervals for tumor assessment                             |
| Atezolizumab | NSCLC             | (Fehrenbacher et al., 2016) | OS               | Every 6 weeks for 36 weeks, followed by 9-weeks interval   | (Rittmeyer et al., 2017)       | OS               | Every 6 weeks for 36 weeks, followed by 9-weeks interval   |
| Atezolizumab | NSCLC             | (Peters et al., 2017)       | ORR              | Every 6 weeks for 12 months, followed by 9-weeks interval  | (Herbst et al., 2020)          | OS               | Every 6 weeks for 48 weeks, followed by 9-weeks interval   |
| Atezolizumab | Bladder cancer    | (Rosenberg et al., 2016)    | ORR              | Every 9 weeks for 12 months, followed by 12-weeks interval | (Powles et al., 2018)          | OS               | Every 9 weeks for 54 weeks, followed by 12-weeks interval  |
| Avelumab     | NSCLC             | (Gulley et al., 2017)       | BOR              | Every 6 weeks                                              | (Barlesi et al., 2018)         | OS               | Every 6 weeks for 12 months, followed by 12-weeks interval |
| Avelumab     | NSCLC             | (Gulley et al., 2017)       | BOR              | Every 6 weeks                                              | (Barlesi et al., 2018)         | OS               | Every 6 weeks for 12 months, followed by 9-weeks interval  |
| Avelumab     | NSCLC             | (Gulley et al., 2017)       | BOR              | Every 6 weeks                                              | (Barlesi et al., 2018)         | OS               | Every 6 weeks for 12 months, followed by 9-weeks interval  |
| Avelumab     | Ovarian cancer    | (Disis et al., 2019)        | BOR              | Every 6 weeks                                              | (Pujade-Lauraine et al., 2021) | OS/PFS           | Every 8 weeks until disease progression                    |
| Camrelizumab | Esophageal cancer | (Huang et al., 2018)        | Safety           | Every 8 weeks for 6 months,                                | (Huang et al., 2020)           | OS               | Every 8 weeks                                              |

|           |                   |                              |        |                                                            |                                  |        |                                                            |
|-----------|-------------------|------------------------------|--------|------------------------------------------------------------|----------------------------------|--------|------------------------------------------------------------|
|           |                   |                              |        | followed by 12-weeks interval                              |                                  |        |                                                            |
| Nivolumab | NSCLC             | (Rizvi et al., 2015)         | ORR    | Every 6 weeks until disease progression                    | (Brahmer et al., 2015)           | OS     | Every 6 weeks                                              |
| Nivolumab | NSCLC             | (Gettinger et al., 2016)     | ORR    | Every 3 months until documented progression                | (Carbone et al., 2017)           | OS     | Every 6 weeks for 48 weeks, followed by 12-weeks interval  |
| Nivolumab | Melanoma          | (Topalian et al., 2012)      | Safety | unknown                                                    | (Larkin et al., 2018)            | ORR/OS | Every 6 weeks for 1 year, followed by 12-weeks interval    |
| Nivolumab | Glioblastoma      | (Omuro et al., 2018)         | Safety | Every 6 weeks for 12 weeks, followed by 8-weeks interval   | (Reardon et al., 2020)           | OS     | Every 6 weeks for 12 weeks, followed by 8-weeks interval   |
| Nivolumab | Ovarian Cancer    | (Hamanishi et al., 2015)     | ORR    | Every 2 months for 1 year or until PD, progression         | (Hamanishi et al., 2021)         | OS     | Every 8 weeks for 48 weeks, followed by 12-weeks interval  |
| Nivolumab | Esophageal cancer | (Kudo et al., 2017)          | ORR    | Every 6 weeks for 1 year, followed by 12-weeks interval    | (Kato et al., 2019)              | OS     | Every 6 weeks for 1 year, followed by 12-weeks interval    |
| Nivolumab | RCC               | (Motzer, Rini, et al., 2015) | ORR    | Every 6 weeks for 12 months, followed by 12-weeks interval | (Motzer, Escudier, et al., 2015) | OS     | Every 8 weeks for 1 year, followed by 12-weeks interval    |
| Nivolumab | Gastric cancer    | (Janjigian et al., 2018)     | ORR    | Every 6 weeks for 24 weeks, followed by 12-weeks interval  | (Kang et al., 2017)              | OS     | Every 6 weeks for 14 months, followed by 12-weeks interval |

|                           |                |                          |        |                                                         |                              |           |                                                            |
|---------------------------|----------------|--------------------------|--------|---------------------------------------------------------|------------------------------|-----------|------------------------------------------------------------|
| Nivolumab                 | MPM            | (Okada et al., 2019)     | ORR    | Every 6 weeks                                           | (Fennell et al., 2021)       | OS/PFS    | Every 6 weeks                                              |
| Pembrolizumab             | HL             | (Chen et al., 2017)      | ORR    | Every 12 weeks                                          | (Kuruville et al., 2021)     | OS/PFS    | Every 12 weeks                                             |
| Pembrolizumab             | TNBC           | (Nanda et al., 2016)     | ORR    | Every 8 weeks                                           | (Winer et al., 2021)         | OS        | Every 9 weeks for 12 months, followed by 12-weeks interval |
| Pembrolizumab             | HNSCC          | (Seiwert et al., 2016)   | ORR    | unknown                                                 | (Cohen et al., 2019)         | OS        | 6 weeks for 1 year, and then 9 weeks                       |
| Pembrolizumab             | Gastric cancer | (Bang et al., 2019)      | ORR    | Every 6 weeks for 1 year, followed by 9-weeks interval  | (Shitara et al., 2020)       | OS/PFS    | Every 6 weeks                                              |
| Pembrolizumab             | Bladder cancer | (Taylor et al., 2020)    | Safety | 24 <sup>th</sup> week                                   | (Y.Loriot et al., 2022)      | OS/PFS    | unknown                                                    |
| Cemiplimab                | Cervix cancer  | (Rischin et al., 2020)   | Safety | Every 8 weeks                                           | (Tewari et al., 2022)        | OS        | Every 4 weeks at beginning, then every 6 weeks             |
| Avelumab+Axitinib         | RCC            | (Choueiri et al., 2018)  | Safety | Every 6 weeks for 1 year, followed by 12-weeks interval | (Motzer et al., 2019)        | OS/PFS    | Every 6 weeks for 18 months, followed by 12-weeks interval |
| Atezolizumab+bevacizumab  | RCC            | (McDermott et al., 2018) | PD/PFS | Every 12 weeks                                          | (Rini, Powles, et al., 2019) | OS/PD/PFS | Every 6 weeks for 78 weeks, followed by 12-weeks interval  |
| Atezolizumab+Chemotherapy | NSCLC          | (Liu et al., 2017)       | Safety | unknown                                                 | (Nishio et al., 2021)        | OS/PFS    | Every 6 weeks for 48 weeks, followed by 9-weeks interval   |

|                                              |                      |                           |        |                                                            |                               |        |                                                            |
|----------------------------------------------|----------------------|---------------------------|--------|------------------------------------------------------------|-------------------------------|--------|------------------------------------------------------------|
| Atezolizumab+Paclitaxel(Albumin bound)       | TNBC                 | (Adams et al., 2019)      | Safety | Every 4 weeks for 1 year, followed by 8-weeks interval     | (Schmid et al., 2018)         | OS/PFS | Every 8 weeks for 12 months, followed by 12-weeks interval |
| Gemcitabine+cisplatin+durvalumab+remelimumab | Biliary tract cancer | (Oh et al., 2022)         | ORR    | Every 6 weeks                                              | (Oh D-Y, 2022)                | OS     | unknown                                                    |
| Camrelizumab+rivoceranib                     | HCC                  | (Xu, Shen, et al., 2021)  | ORR    | 8 weeks for 48 weeks, and then 12 weeks                    | (Qin et al., 2022)            | OS/PFS | unknown                                                    |
| Atezolizumab+Cobimetinib                     | Melanoma             | (Hellmann et al., 2019)   | ORR    | Every 8 weeks                                              | (Gogas et al., 2021)          | ORR/OS | Every 8 weeks for 80 weeks, followed by 12-weeks interval  |
| Atezolizumab+Cobimetinib                     | CRC                  | (Hellmann et al., 2019)   | ORR    | Every 8 weeks                                              | (Eng et al., 2019)            | OS/PFS | Every 8 weeks until PD                                     |
| Nivolumab+bempegaldesleukin                  | Melanoma             | (Diab et al., 2021)       | Safety | Every 8 weeks                                              | (Diab, 2022)                  | PFS    | unknown                                                    |
| Nivolumab+bempegaldesleukin                  | RCC                  | (Tannir et al., 2022)     | ORR    | Every 8 weeks                                              | (Nizar Tannir, 2022)          | ORR/OS | unknown                                                    |
| Pembrolizumab+talimogene laherparepvec       | Melanoma             | (G. V. Long et al., 2016) | Safety | unknown                                                    | (Chesney et al., 2023)        | OS/PFS | Every 12 weeks                                             |
| Pembrolizumab+Axitinib                       | RCC                  | (Atkins et al., 2018)     | Safety | Every 6 weeks for 66 weeks, followed by 12-weeks interval  | (Rini, Plimack, et al., 2019) | OS/PFS | Every 6 weeks for 54 weeks, followed by 12-weeks interval  |
| Pembrolizumab+Epacadostat                    | Melanoma             | (Mitchell et al., 2018)   | ORR    | Every 9 weeks for 18 months, followed by 12-weeks interval | (Long et al., 2019)           | OS/PFS | Every 9 weeks for 102 weeks, followed by 12-weeks interval |
| Pembrolizumab+Chemotherapy                   | TNBC                 | (Chun et al., 2022)       | Safety | unknown                                                    | (Cortes et al., 2020)         | OS/PFS | Every 8 weeks for 24 weeks,                                |

|                                          |                    |                          |         |                                                            |                             |        |                                                            |
|------------------------------------------|--------------------|--------------------------|---------|------------------------------------------------------------|-----------------------------|--------|------------------------------------------------------------|
|                                          |                    |                          |         |                                                            |                             |        | followed by 9-weeks interval                               |
| Pembrolizumab+Chemotherapy               | Gastric cancer     | (Bang et al., 2019)      | ORR     | Every 6 weeks for 1 year, followed by 9-weeks interval     | (Shitara et al., 2020)      | OS/PFS | Every 6 weeks                                              |
| Pembrolizumab+Lenvatinib                 | HCC                | (Finn et al., 2020)      | ORR     | Every 6 weeks for 24 weeks, followed by 9-weeks interval   | (Finn, 2022)                | OS/PFS | unknown                                                    |
| Lenvatinib+Pembrolizumab                 | endometrial cancer | (Makker et al., 2020)    | ORR     | Every 8 weeks                                              | (Makker et al., 2022)       | OS/PFS | Every 6 weeks for 24 weeks, followed by 9-weeks interval   |
| Pembrolizumab+pomalidomide+dexamethasone | MM                 | (Badros et al., 2017)    | Safety  | unknown                                                    | (Mateos et al., 2019)       | OS/PFS | unknown                                                    |
| Pembrolizumab+Dabrafenib+trametinib      | Melanoma           | (Ascierto et al., 2019)  | ORR/PFS | Every 6 weeks for 18 months, followed by 12-weeks interval | (Dummer et al., 2022)       | PFS    | unknown                                                    |
| Pembrolizumab+trastuzumab                | Gastric cancer     | (Janjigian et al., 2020) | PFS     | Every 9 weeks                                              | (Janjigian & Kawazoe, 2021) | OR/PFS | Every 6 weeks                                              |
| Durvalumab+Tremelimumab+Chemotherapy     | NSCLC              | (Antonia et al., 2016)   | ORR     | Every 8 weeks for 12 months, followed by 6-months interval | (Planchard et al., 2020)    | OS     | Every 8 weeks for 12 months, followed by 6-months interval |
| Atezolizumab+cobimetinib+vemurafenib     | Melanoma           | (Sullivan et al., 2019)  | Safety  | Every 4 weeks                                              | (Gutzmer et al., 2020)      | PFS    | Every 8 weeks for 24 months, followed by 12-weeks interval |
| Sintilimab+IBI305                        | HCC                | (Ren et al.,             | OS/PFS  | Every 6 weeks                                              | (Ren et al.,                | OS/PFS | Every 6 weeks                                              |



|                                     |                       |                            |     |                                                                     |                                 |        |                                                                     |
|-------------------------------------|-----------------------|----------------------------|-----|---------------------------------------------------------------------|---------------------------------|--------|---------------------------------------------------------------------|
|                                     |                       | 2021)                      |     | for 48 weeks,<br>followed by 12-<br>weeks interval                  | 2021)                           |        | for 48 weeks,<br>followed by 12-<br>weeks interval                  |
| Sintilimab+chemotherapy             | NSCLC-Squamous        | (Jiang et al.,<br>2021)    | ORR | Every 9 weeks                                                       | (Zhou et<br>al., 2021)          | OS/PFS | Every 9 weeks<br>for 48 weeks,<br>followed by 12-<br>weeks interval |
| Sintilimab+chemotherapy             | NSCLC-Non<br>Squamous | (Jiang et al.,<br>2021)    | ORR | Every 9 weeks                                                       | (Yang et<br>al., 2020)          | OS/PFS | Every 9 weeks<br>for 48 weeks,<br>followed by 12-<br>weeks interval |
| Oxaliplatin+Sintilimab+Capecitabine | Gastric cancer        | (Jiang et al.,<br>2020)    | ORR | Every 9 weeks                                                       | (Xu, Jiang,<br>et al.,<br>2021) | OS     | unknown                                                             |
| Nivolumab+Ipilimumab                | NSCLC                 | (Hellmann et<br>al., 2017) | ORR | Every 6 weeks<br>for 24 weeks,<br>followed by 12-<br>weeks interval | (Hellmann<br>et al.,<br>2018)   | OS/PFS | Every 6 weeks<br>for 24 weeks,<br>followed by 12-<br>weeks interval |
| Ipilimumab+Nivolumab                | Melanoma              | (Hodi et al.,<br>2016)     | ORR | Every 6 weeks<br>for 1 year,<br>followed by 12-<br>weeks interval   | (Larkin et<br>al., 2015)        | OS/PFS | Every 6 weeks<br>for 49 weeks,<br>followed by 12-<br>weeks interval |

Supplementary Table 3. Cochrane standards for assessing risk of bias in included studies

| Study                          | Random sequence generation (selection bias) | Allocation concealment (selection bias) | Blinding of participants and personell (performance bias) | Blinding of outcome assessment (detection bias) | Incomplete outcome data (attrition bias) | Selective reporting (reporting bias) |
|--------------------------------|---------------------------------------------|-----------------------------------------|-----------------------------------------------------------|-------------------------------------------------|------------------------------------------|--------------------------------------|
| (Fehrenbacher et al., 2016)    | Low risk                                    | Low risk                                | Low risk                                                  | Low risk                                        | Low risk                                 | Low risk                             |
| (Rittmeyer et al., 2017)       | Low risk                                    | Low risk                                | Low risk                                                  | Low risk                                        | Low risk                                 | Low risk                             |
| (Peters et al., 2017)          | Low risk                                    | Unclear risk                            | Low risk                                                  | Low risk                                        | Low risk                                 | Low risk                             |
| (Herbst et al., 2020)          | Low risk                                    | Low risk                                | Low risk                                                  | Low risk                                        | Low risk                                 | Unclear risk                         |
| (Rosenberg et al., 2016)       | Low risk                                    | Low risk                                | Low risk                                                  | Low risk                                        | Low risk                                 | Low risk                             |
| (Powles et al., 2018)          | Low risk                                    | Low risk                                | Low risk                                                  | Low risk                                        | Low risk                                 | Low risk                             |
| (Gulley et al., 2017)          | Low risk                                    | Low risk                                | Low risk                                                  | Low risk                                        | Low risk                                 | Low risk                             |
| (Barlesi et al., 2018)         | Low risk                                    | Unclear risk                            | Low risk                                                  | Low risk                                        | Low risk                                 | Low risk                             |
| (Gulley et al., 2017)          | Unclear risk                                | Low risk                                | Low risk                                                  | Low risk                                        | Low risk                                 | Low risk                             |
| (Barlesi et al., 2018)         | Low risk                                    | Low risk                                | Low risk                                                  | Low risk                                        | Low risk                                 | Unclear risk                         |
| (Gulley et al., 2017)          | Low risk                                    | Low risk                                | Low risk                                                  | Low risk                                        | Low risk                                 | Low risk                             |
| (Barlesi et al., 2018)         | Low risk                                    | Low risk                                | Low risk                                                  | Low risk                                        | Low risk                                 | Low risk                             |
| (Disis et al., 2019)           | Low risk                                    | Low risk                                | Low risk                                                  | Low risk                                        | Low risk                                 | Low risk                             |
| (Pujade-Lauraine et al., 2021) | Low risk                                    | Low risk                                | Low risk                                                  | Low risk                                        | Low risk                                 | Low risk                             |
| (Huang et al., 2018)           | Low risk                                    | Unclear risk                            | Low risk                                                  | Low risk                                        | Unclear risk                             | Low risk                             |
| (Huang et al., 2020)           | Low risk                                    | Low risk                                | Low risk                                                  | Low risk                                        | Low risk                                 | Low risk                             |
| (Rizvi et al., 2015)           | Unclear risk                                | Low risk                                | Low risk                                                  | Low risk                                        | Low risk                                 | Low risk                             |
| (Brahmer et al., 2015)         | Low risk                                    | Low risk                                | Low risk                                                  | Low risk                                        | Low risk                                 | Unclear risk                         |
| (Gettinger et al., 2016)       | Low risk                                    | Unclear risk                            | Low risk                                                  | Low risk                                        | Low risk                                 | Low risk                             |
| (Carbone et al., 2017)         | Low risk                                    | Low risk                                | Low risk                                                  | Low risk                                        | Low risk                                 | Low risk                             |
| (Topalian et al., 2012)        | Low risk                                    | Low risk                                | Low risk                                                  | Low risk                                        | Low risk                                 | Unclear risk                         |

|                                  |              |              |          |          |              |              |
|----------------------------------|--------------|--------------|----------|----------|--------------|--------------|
| (Larkin et al., 2018)            | Unclear risk | Low risk     | Low risk | Low risk | Low risk     | Low risk     |
| (Omuro et al., 2018)             | Low risk     | Low risk     | Low risk | Low risk | Low risk     | Low risk     |
| (Reardon et al., 2020)           | Low risk     | Low risk     | Low risk | Low risk | Low risk     | Low risk     |
| (Hamanishi et al., 2015)         | Low risk     | Low risk     | Low risk | Low risk | Low risk     | Unclear risk |
| (Hamanishi et al., 2021)         | Low risk     | Low risk     | Low risk | Low risk | Low risk     | Low risk     |
| (Kudo et al., 2017)              | Low risk     | Low risk     | Low risk | Low risk | Low risk     | Unclear risk |
| (Kato et al., 2019)              | Low risk     | Low risk     | Low risk | Low risk | Unclear risk | Low risk     |
| (Motzer, Rini, et al., 2015)     | Low risk     | Low risk     | Low risk | Low risk | Low risk     | Low risk     |
| (Motzer, Escudier, et al., 2015) | Low risk     | Unclear risk | Low risk | Low risk | Low risk     | Low risk     |
| (Janjigian et al., 2018)         | Unclear risk | Low risk     | Low risk | Low risk | Low risk     | Unclear risk |
| (Kang et al., 2017)              | Low risk     | Low risk     | Low risk | Low risk | Low risk     | Low risk     |
| (Okada et al., 2019)             | Low risk     | Low risk     | Low risk | Low risk | Low risk     | Low risk     |
| (Fennell et al., 2021)           | Low risk     | Low risk     | Low risk | Low risk | Low risk     | Low risk     |
| (Chen et al., 2017)              | Low risk     | Low risk     | Low risk | Low risk | Unclear risk | Low risk     |
| (Kuruvilla et al., 2021)         | Low risk     | Low risk     | Low risk | Low risk | Low risk     | Low risk     |
| (Nanda et al., 2016)             | Low risk     | Low risk     | Low risk | Low risk | Low risk     | Unclear risk |
| (Winer et al., 2021)             | Unclear risk | Unclear risk | Low risk | Low risk | Low risk     | Low risk     |
| (Seiwert et al., 2016)           | Low risk     | Low risk     | Low risk | Low risk | Low risk     | Low risk     |
| (Cohen et al., 2019)             | Low risk     | Low risk     | Low risk | Low risk | Unclear risk | Low risk     |
| (Bang et al., 2019)              | Low risk     | Low risk     | Low risk | Low risk | Low risk     | Low risk     |
| (Shitara et al., 2020)           | Low risk     | Low risk     | Low risk | Low risk | Low risk     | Low risk     |
| (Taylor et al., 2020)            | Low risk     | Low risk     | Low risk | Low risk | Low risk     | Unclear risk |
| (Y.Loriot et al., 2022)          | Low risk     | Low risk     | Low risk | Low risk | Low risk     | Low risk     |
| (Rischin et al., 2020)           | Low risk     | Low risk     | Low risk | Low risk | Low risk     | Low risk     |
| (Tewari et al., 2022)            | Low risk     | Low risk     | Low risk | Low risk | Low risk     | Low risk     |
| (Choueiri et al., 2018)          | Low risk     | Low risk     | Low risk | Low risk | Unclear risk | Low risk     |

|                               |              |              |              |          |              |              |
|-------------------------------|--------------|--------------|--------------|----------|--------------|--------------|
| (Motzer et al., 2019)         | Low risk     | Low risk     | Low risk     | Low risk | Low risk     | Unclear risk |
| (McDermott et al., 2018)      | Low risk     | Low risk     | Low risk     | Low risk | Low risk     | Low risk     |
| (Rini, Powles, et al., 2019)  | Low risk     | Low risk     | Low risk     | Low risk | Low risk     | Low risk     |
| (Liu et al., 2017)            | Unclear risk | Low risk     | Low risk     | Low risk | Low risk     | Low risk     |
| (Nishio et al., 2021)         | Low risk     | Low risk     | Low risk     | Low risk | Low risk     | Unclear risk |
| (Adams et al., 2019)          | Low risk     | Low risk     | Low risk     | Low risk | Low risk     | Low risk     |
| (Schmid et al., 2018)         | Low risk     | Unclear risk | Low risk     | Low risk | Low risk     | Low risk     |
| (Oh et al., 2022)             | Low risk     | Low risk     | Low risk     | Low risk | Unclear risk | Low risk     |
| (Oh D-Y, 2022)                | unknown      | unknown      | unknown      | unknown  | unknown      | unknown      |
| (Xu, Shen, et al., 2021)      | Low risk     | Low risk     | Low risk     | Low risk | Low risk     | Low risk     |
| (Qin et al., 2022)            | unknown      | unknown      | unknown      | unknown  | unknown      | unknown      |
| (Hellmann et al., 2019)       | Low risk     | Low risk     | Low risk     | Low risk | Low risk     | Unclear risk |
| (Gogas et al., 2021)          | Low risk     | Unclear risk | Low risk     | Low risk | Low risk     | Low risk     |
| (Hellmann et al., 2019)       | Unclear risk | Low risk     | Low risk     | Low risk | Low risk     | Low risk     |
| (Eng et al., 2019)            | Low risk     | Low risk     | Low risk     | Low risk | Unclear risk | Low risk     |
| (Diab et al., 2021)           | Low risk     | Low risk     | Low risk     | Low risk | Low risk     | Low risk     |
| (Diab, 2022)                  | unknown      | unknown      | unknown      | unknown  | unknown      | unknown      |
| (Tannir et al., 2022)         | Low risk     | Low risk     | Low risk     | Low risk | Low risk     | Low risk     |
| (Nizar Tannir, 2022)          | unknown      | unknown      | unknown      | unknown  | unknown      | unknown      |
| (G. V. Long et al., 2016)     | Low risk     | Low risk     | Low risk     | Low risk | Low risk     | Unclear risk |
| (Chesney et al., 2023)        | Low risk     | Low risk     | Low risk     | Low risk | Low risk     | Low risk     |
| (Atkins et al., 2018)         | Low risk     | Low risk     | Low risk     | Low risk | Low risk     | Low risk     |
| (Rini, Plimack, et al., 2019) | Low risk     | Low risk     | Low risk     | Low risk | Low risk     | Low risk     |
| (Mitchell et al., 2018)       | Unclear risk | Low risk     | Low risk     | Low risk | Unclear risk | Low risk     |
| (Long et al., 2019)           | Low risk     | Low risk     | Unclear risk | Low risk | Low risk     | Low risk     |
| (Chun et al., 2022)           | Unclear risk | Low risk     | Low risk     | Low risk | Low risk     | Unclear risk |

|                             |              |              |          |              |              |              |
|-----------------------------|--------------|--------------|----------|--------------|--------------|--------------|
| (Cortes et al., 2020)       | Low risk     | Low risk     | Low risk | Low risk     | Unclear risk | Low risk     |
| (Bang et al., 2019)         | Low risk     | Low risk     | Low risk | Low risk     | Low risk     | Low risk     |
| (Shitara et al., 2020)      | Low risk     | Low risk     | Low risk | Low risk     | Low risk     | Low risk     |
| (Finn et al., 2020)         | Low risk     | Low risk     | Low risk | Low risk     | Low risk     | Low risk     |
| (Finn, 2022)                | unknown      | unknown      | unknown  | unknown      | unknown      | unknown      |
| (Makker et al., 2020)       | Low risk     | Low risk     | Low risk | Low risk     | Unclear risk | Low risk     |
| (Makker et al., 2022)       | Unclear risk | Low risk     | Low risk | Low risk     | Low risk     | Low risk     |
| (Badros et al., 2017)       | Low risk     | Low risk     | Low risk | Low risk     | Unclear risk | Low risk     |
| (Mateos et al., 2019)       | Low risk     | Low risk     | Low risk | Low risk     | Low risk     | Low risk     |
| (Ascierto et al., 2019)     | Low risk     | Low risk     | Low risk | Low risk     | Low risk     | Unclear risk |
| (Dummer et al., 2022)       | Low risk     | Low risk     | Low risk | Low risk     | Low risk     | Low risk     |
| (Janjigian et al., 2020)    | Low risk     | Low risk     | Low risk | Low risk     | Unclear risk | Low risk     |
| (Janjigian & Kawazoe, 2021) | Low risk     | Unclear risk | Low risk | Low risk     | Low risk     | Low risk     |
| (Antonia et al., 2016)      | Low risk     | Low risk     | Low risk | Low risk     | Low risk     | Low risk     |
| (Planchard et al., 2020)    | Unclear risk | Low risk     | Low risk | Low risk     | Low risk     | Low risk     |
| (Sullivan et al., 2019)     | Low risk     | Low risk     | Low risk | Low risk     | Low risk     | Low risk     |
| (Gutzmer et al., 2020)      | Low risk     | Low risk     | Low risk | Low risk     | Low risk     | Unclear risk |
| (Ren et al., 2021)          | Unclear risk | Low risk     | Low risk | Low risk     | Low risk     | Low risk     |
| (Ren et al., 2021)          | Low risk     | Low risk     | Low risk | Low risk     | Unclear risk | Low risk     |
| (Jiang et al., 2021)        | Low risk     | Low risk     | Low risk | Low risk     | Low risk     | Low risk     |
| (Zhou et al., 2021)         | Unclear risk | Unclear risk | Low risk | Low risk     | Low risk     | Low risk     |
| (Jiang et al., 2021)        | Unclear risk | Low risk     | Low risk | Low risk     | Low risk     | Low risk     |
| (Yang et al., 2020)         | Low risk     | Low risk     | Low risk | Low risk     | Low risk     | Low risk     |
| (Jiang et al., 2020)        | Low risk     | Low risk     | Low risk | Unclear risk | Low risk     | Low risk     |
| (Xu, Jiang, et al., 2021)   | unknown      | unknown      | unknown  | unknown      | unknown      | unknown      |
| (Hellmann et al., 2017)     | Unclear risk | Low risk     | Low risk | Low risk     | Unclear risk | Low risk     |

|                         |          |              |              |          |              |          |
|-------------------------|----------|--------------|--------------|----------|--------------|----------|
| (Hellmann et al., 2018) | Low risk | Low risk     | Low risk     | Low risk | Low risk     | Low risk |
| (Hodi et al., 2016)     | Low risk | Unclear risk | Unclear risk | Low risk | Unclear risk | Low risk |
| (Larkin et al., 2015)   | Low risk | Low risk     | Low risk     | Low risk | Low risk     | Low risk |

Supplementary Table 4. Multinomial logistics models for determinants of overestimation.

| Models                                         | Estimate | Standard Error | P value            |
|------------------------------------------------|----------|----------------|--------------------|
| <b>Multinomial Logistic Model 1</b>            |          |                |                    |
| Autoimmune disease                             | 2.205818 | 0.935784       | <b>0.0184139*</b>  |
| Other malignancy history                       | -0.29868 | 0.799317       | 0.7086488          |
| PD-1 expression of tumor cells or immune cells | -1.24573 | 0.787039       | 0.1134648          |
| Size                                           | 0.001129 | 0.002598       | 0.6637954          |
| <b>Multinomial Logistic Model 2</b>            |          |                |                    |
| Autoimmune disease                             | 2.206813 | 0.936306       | <b>0.01842643*</b> |
| PD-1 expression of tumor cells or immune cells | -1.18696 | 0.782397       | 0.12924528         |
| Prior immunotherapy treatment                  | 0.247124 | 1.018564       | 0.80829974         |
| Size                                           | 0.001393 | 0.002509       | 0.57878478         |
| <b>Multinomial Logistic Model 3</b>            |          |                |                    |
| Autoimmune disease                             | 2.099053 | 0.927734       | <b>0.02366291*</b> |
| PD-1 expression of tumor cells or immune cells | -1.17903 | 0.783309       | 0.13227475         |
| Immunosuppressive therapy                      | 0.438969 | 0.705617       | 0.53387211         |
| Size                                           | 0.00177  | 0.002581       | 0.49279497         |

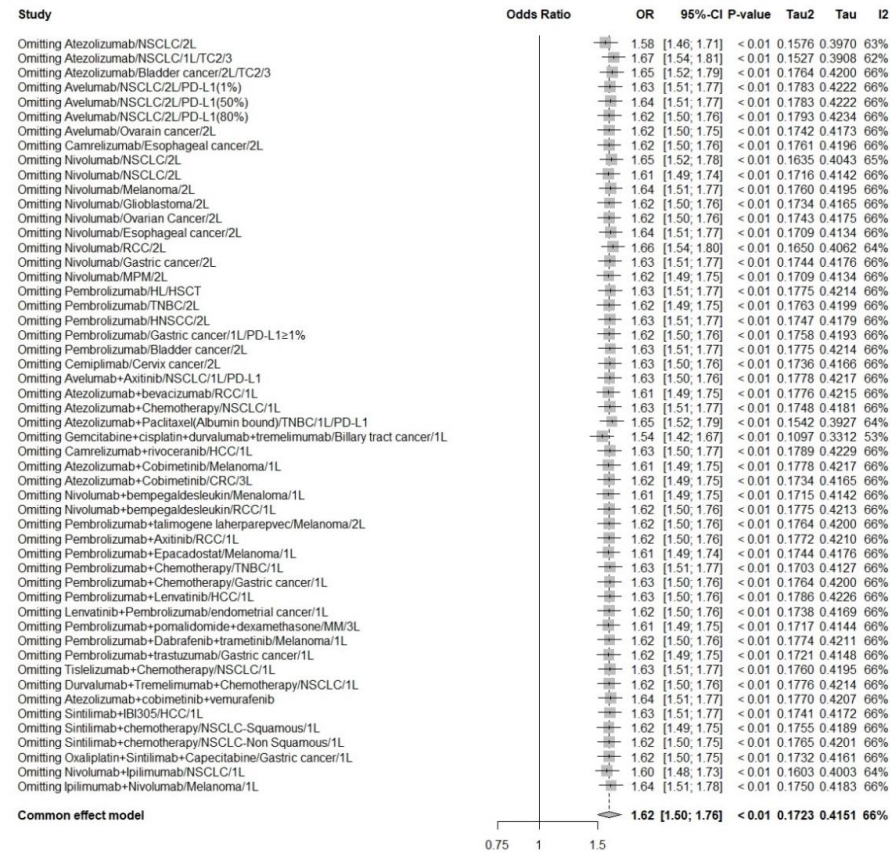

Supplementary Figure 1. Stepwise exclusion approach to evaluate sensitivity.



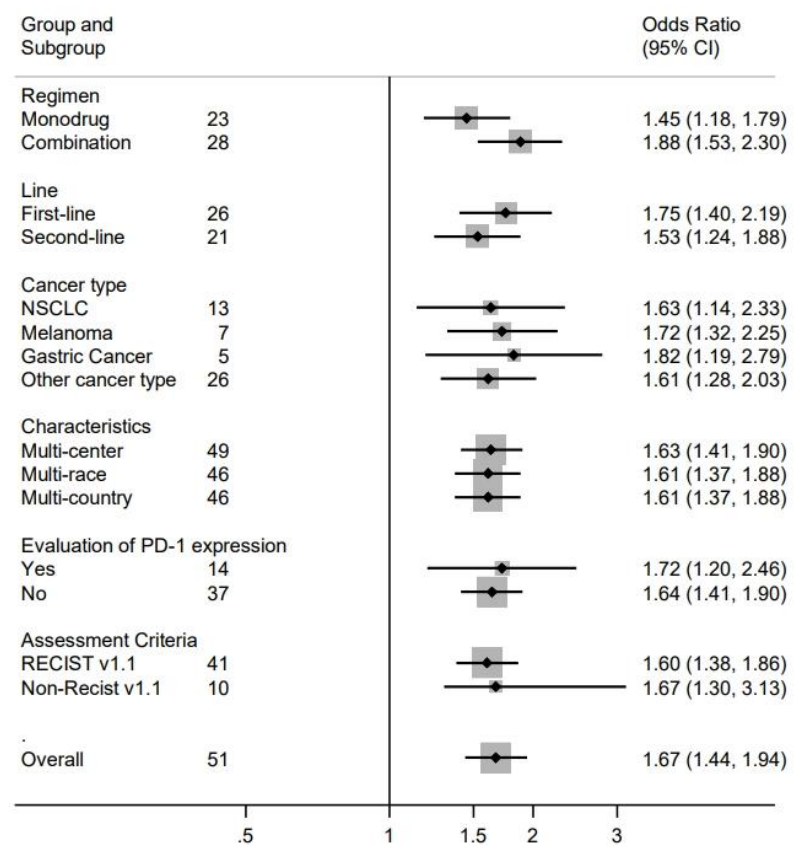

Supplementary Figure 2. subgroup analysis. combined results of these subgroups were statistically significant and consistent with the original conclusion of the meta-analysis.

## References

- Adams, S., Diamond, J. R., Hamilton, E., Pohlmann, P. R., Tolaney, S. M., Chang, C. W., Zhang, W., Iizuka, K., Foster, P. G., Molinero, L., Funke, R., & Powderly, J. (2019). Atezolizumab Plus nab-Paclitaxel in the Treatment of Metastatic Triple-Negative Breast Cancer With 2-Year Survival Follow-up: A Phase 1b Clinical Trial. *JAMA Oncol*, *5*(3), 334-342. <https://doi.org/10.1001/jamaoncol.2018.5152>
- Antonia, S., Goldberg, S. B., Balmanoukian, A., Chaft, J. E., Sanborn, R. E., Gupta, A., Narwal, R., Steele, K., Gu, Y., Karakunnel, J. J., & Rizvi, N. A. (2016). Safety and antitumour activity of durvalumab plus tremelimumab in non-small cell lung cancer: a multicentre, phase 1b study. *Lancet Oncol*, *17*(3), 299-308. [https://doi.org/10.1016/S1470-2045\(15\)00544-6](https://doi.org/10.1016/S1470-2045(15)00544-6)
- Ascierto, P. A., Ferrucci, P. F., Fisher, R., Del Vecchio, M., Atkinson, V., Schmidt, H., Schachter, J., Queirolo, P., Long, G. V., Di Giacomo, A. M., Svane, I. M., Lotem, M., Bar-Sela, G., Couture, F., Mookerjee, B., Ghori, R., Ibrahim, N., Moreno, B. H., & Ribas, A. (2019). Dabrafenib, trametinib and pembrolizumab or placebo in BRAF-mutant melanoma. *Nat Med*, *25*(6), 941-946. <https://doi.org/10.1038/s41591-019-0448-9>
- Atkins, M. B., Plimack, E. R., Puzanov, I., Fishman, M. N., McDermott, D. F., Cho, D. C., Vaishampayan, U., George, S., Olencki, T. E., Tarazi, J. C., Rosbrook, B., Fernandez, K. C., Lechuga, M., & Choueiri, T. K. (2018). Axitinib in combination with pembrolizumab in patients with advanced renal cell cancer: a non-randomised, open-label, dose-finding, and dose-expansion phase 1b trial. *Lancet Oncol*, *19*(3), 405-415.

[https://doi.org/10.1016/S1470-2045\(18\)30081-0](https://doi.org/10.1016/S1470-2045(18)30081-0)

Badros, A., Hyjek, E., Ma, N., Lesokhin, A., Dogan, A., Rapoport, A. P., Kocoglu, M., Lederer, E., Philip, S., Milliron, T., Dell, C., Goloubeva, O., & Singh, Z.

(2017). Pembrolizumab, pomalidomide, and low-dose dexamethasone for relapsed/refractory multiple myeloma. *Blood*, *130*(10), 1189-1197.

<https://doi.org/10.1182/blood-2017-03-775122>

Bang, Y. J., Kang, Y. K., Catenacci, D. V., Muro, K., Fuchs, C. S., Geva, R., Hara, H., Golan, T., Garrido, M., Jalal, S. I., Borg, C., Doi, T., Yoon, H. H.,

Savage, M. J., Wang, J., Dalal, R. P., Shah, S., Wainberg, Z. A., & Chung, H. C. (2019). Pembrolizumab alone or in combination with chemotherapy

as first-line therapy for patients with advanced gastric or gastroesophageal junction adenocarcinoma: results from the phase II nonrandomized

KEYNOTE-059 study. *Gastric Cancer*, *22*(4), 828-837. <https://doi.org/10.1007/s10120-018-00909-5>

Barlesi, F., Vansteenkiste, J., Spigel, D., Ishii, H., Garassino, M., de Marinis, F., Ozguroglu, M., Szczesna, A., Polychronis, A., Uslu, R., Krzakowski, M., Lee,

J. S., Calabro, L., Aren Frontera, O., Ellers-Lenz, B., Bajars, M., Ruisi, M., & Park, K. (2018). Avelumab versus docetaxel in patients with platinum-

treated advanced non-small-cell lung cancer (JAVELIN Lung 200): an open-label, randomised, phase 3 study. *Lancet Oncol*, *19*(11), 1468-1479.

[https://doi.org/10.1016/S1470-2045\(18\)30673-9](https://doi.org/10.1016/S1470-2045(18)30673-9)

Brahmer, J., Reckamp, K. L., Baas, P., Crino, L., Eberhardt, W. E., Poddubskaya, E., Antonia, S., Pluzanski, A., Vokes, E. E., Holgado, E., Waterhouse, D.,

- Ready, N., Gainor, J., Aren Frontera, O., Havel, L., Steins, M., Garassino, M. C., Aerts, J. G., Domine, M., . . . Spigel, D. R. (2015). Nivolumab versus Docetaxel in Advanced Squamous-Cell Non-Small-Cell Lung Cancer. *N Engl J Med*, *373*(2), 123-135. <https://doi.org/10.1056/NEJMoa1504627>
- Carbone, D. P., Reck, M., Paz-Ares, L., Creelan, B., Horn, L., Steins, M., Felip, E., van den Heuvel, M. M., Ciuleanu, T. E., Badin, F., Ready, N., Hiltermann, T. J. N., Nair, S., Juergens, R., Peters, S., Minenza, E., Wrangle, J. M., Rodriguez-Abreu, D., Borghaei, H., . . . CheckMate, I. (2017). First-Line Nivolumab in Stage IV or Recurrent Non-Small-Cell Lung Cancer. *N Engl J Med*, *376*(25), 2415-2426. <https://doi.org/10.1056/NEJMoa1613493>
- Chen, R., Zinzani, P. L., Fanale, M. A., Armand, P., Johnson, N. A., Brice, P., Radford, J., Ribrag, V., Molin, D., Vassilakopoulos, T. P., Tomita, A., von Tresckow, B., Shipp, M. A., Zhang, Y., Ricart, A. D., Balakumaran, A., Moskowitz, C. H., & Keynote. (2017). Phase II Study of the Efficacy and Safety of Pembrolizumab for Relapsed/Refractory Classic Hodgkin Lymphoma. *J Clin Oncol*, *35*(19), 2125-2132. <https://doi.org/10.1200/JCO.2016.72.1316>
- Chesney, J. A., Ribas, A., Long, G. V., Kirkwood, J. M., Dummer, R., Puzanov, I., Hoeller, C., Gajewski, T. F., Gutzmer, R., Rutkowski, P., Demidov, L., Arenberger, P., Shin, S. J., Ferrucci, P. F., Haydon, A., Hyngstrom, J., van Thienen, J. V., Haferkamp, S., Guilera, J. M., . . . Gogas, H. (2023). Randomized, Double-Blind, Placebo-Controlled, Global Phase III Trial of Talimogene Laherparepvec Combined With Pembrolizumab for Advanced Melanoma. *J Clin Oncol*, *41*(3), 528-540. <https://doi.org/10.1200/JCO.22.00343>
- Choueiri, T. K., Larkin, J., Oya, M., Thistlethwaite, F., Martignoni, M., Nathan, P., Powles, T., McDermott, D., Robbins, P. B., Chism, D. D., Cho, D., Atkins, M.

- B., Gordon, M. S., Gupta, S., Uemura, H., Tomita, Y., Compagnoni, A., Fowst, C., di Pietro, A., & Rini, B. I. (2018). Preliminary results for avelumab plus axitinib as first-line therapy in patients with advanced clear-cell renal-cell carcinoma (JAVELIN Renal 100): an open-label, dose-finding and dose-expansion, phase 1b trial. *Lancet Oncol*, *19*(4), 451-460. [https://doi.org/10.1016/S1470-2045\(18\)30107-4](https://doi.org/10.1016/S1470-2045(18)30107-4)
- Chun, B., Pucilowska, J., Chang, S., Kim, I., Nikitin, B., Koguchi, Y., Redmond, W. L., Bernard, B., Rajamanickam, V., Polaske, N., Fields, P. A., Conrad, V., Schmidt, M., Urba, W. J., Conlin, A. K., McArthur, H. L., & Page, D. B. (2022). Changes in T-cell subsets and clonal repertoire during chemoimmunotherapy with pembrolizumab and paclitaxel or capecitabine for metastatic triple-negative breast cancer. *J Immunother Cancer*, *10*(1). <https://doi.org/10.1136/jitc-2021-004033>
- Cohen, E. E. W., Soulieres, D., Le Tourneau, C., Dinis, J., Licitra, L., Ahn, M. J., Soria, A., Machiels, J. P., Mach, N., Mehra, R., Burtness, B., Zhang, P., Cheng, J., Swaby, R. F., Harrington, K. J., & investigators, K.-. (2019). Pembrolizumab versus methotrexate, docetaxel, or cetuximab for recurrent or metastatic head-and-neck squamous cell carcinoma (KEYNOTE-040): a randomised, open-label, phase 3 study. *Lancet*, *393*(10167), 156-167. [https://doi.org/10.1016/S0140-6736\(18\)31999-8](https://doi.org/10.1016/S0140-6736(18)31999-8)
- Cortes, J., Cescon, D. W., Rugo, H. S., Nowecki, Z., Im, S. A., Yusof, M. M., Gallardo, C., Lipatov, O., Barrios, C. H., Holgado, E., Iwata, H., Masuda, N., Otero, M. T., Gokmen, E., Loi, S., Guo, Z., Zhao, J., Aktan, G., Karantza, V., . . . Investigators, K.-. (2020). Pembrolizumab plus chemotherapy versus

- placebo plus chemotherapy for previously untreated locally recurrent inoperable or metastatic triple-negative breast cancer (KEYNOTE-355): a randomised, placebo-controlled, double-blind, phase 3 clinical trial. *Lancet*, 396(10265), 1817-1828. [https://doi.org/10.1016/S0140-6736\(20\)32531-9](https://doi.org/10.1016/S0140-6736(20)32531-9)
- Diab, A. (2022). *First disclosure of efficacy and safety of bempedaldesleukin (BEMPEG) plus nivolumab (NIVO) vs NIVO monotherapy in advanced melanoma (MEL)*. <https://oncologypro.esmo.org/meeting-resources/esmo-congress/pivot-io-001-first-disclosure-of-efficacy-and-safety-of-bempedaldesleukin-bempeg-plus-nivolumab-nivo-vs-nivo-monotherapy-in-advanced-melanoma>
- Diab, A., Tykodi, S. S., Daniels, G. A., Maio, M., Curti, B. D., Lewis, K. D., Jang, S., Kalinka, E., Puzanov, I., Spira, A. I., Cho, D. C., Guan, S., Puente, E., Nguyen, T., Hoch, U., Currie, S. L., Lin, W., Tagliaferri, M. A., Zalevsky, J., . . . Hurwitz, M. E. (2021). Bempedaldesleukin Plus Nivolumab in First-Line Metastatic Melanoma. *J Clin Oncol*, 39(26), 2914-2925. <https://doi.org/10.1200/JCO.21.00675>
- Disis, M. L., Taylor, M. H., Kelly, K., Beck, J. T., Gordon, M., Moore, K. M., Patel, M. R., Chaves, J., Park, H., Mita, A. C., Hamilton, E. P., Annunziata, C. M., Grote, H. J., von Heydebreck, A., Grewal, J., Chand, V., & Gulley, J. L. (2019). Efficacy and Safety of Avelumab for Patients With Recurrent or Refractory Ovarian Cancer: Phase 1b Results From the JAVELIN Solid Tumor Trial. *JAMA Oncol*, 5(3), 393-401. <https://doi.org/10.1001/jamaoncol.2018.6258>
- Dummer, R., Long, G. V., Robert, C., Tawbi, H. A., Flaherty, K. T., Ascierto, P. A., Nathan, P. D., Rutkowski, P., Leonov, O., Dutriaux, C., Mandala, M.,

- Lorigan, P., Ferrucci, P. F., Grob, J. J., Meyer, N., Gogas, H., Stroyakovskiy, D., Arance, A., Brase, J. C., . . . Schadendorf, D. (2022). Randomized Phase III Trial Evaluating Spaltalizumab Plus Dabrafenib and Trametinib for BRAF V600-Mutant Unresectable or Metastatic Melanoma. *J Clin Oncol*, *40*(13), 1428-1438. <https://doi.org/10.1200/JCO.21.01601>
- Eng, C., Kim, T. W., Bendell, J., Argiles, G., Tebbutt, N. C., Di Bartolomeo, M., Falcone, A., Fakih, M., Kozloff, M., Segal, N. H., Sobrero, A., Yan, Y., Chang, I., Uyei, A., Roberts, L., Ciardiello, F., & Investigators, I. M. (2019). Atezolizumab with or without cobimetinib versus regorafenib in previously treated metastatic colorectal cancer (IMblaze370): a multicentre, open-label, phase 3, randomised, controlled trial. *Lancet Oncol*, *20*(6), 849-861. [https://doi.org/10.1016/S1470-2045\(19\)30027-0](https://doi.org/10.1016/S1470-2045(19)30027-0)
- Fehrenbacher, L., Spira, A., Ballinger, M., Kowanzetz, M., Vansteenkiste, J., Mazieres, J., Park, K., Smith, D., Artal-Cortes, A., Lewanski, C., Braiteh, F., Waterkamp, D., He, P., Zou, W., Chen, D. S., Yi, J., Sandler, A., Rittmeyer, A., & Group, P. S. (2016). Atezolizumab versus docetaxel for patients with previously treated non-small-cell lung cancer (POPLAR): a multicentre, open-label, phase 2 randomised controlled trial. *Lancet*, *387*(10030), 1837-1846. [https://doi.org/10.1016/S0140-6736\(16\)00587-0](https://doi.org/10.1016/S0140-6736(16)00587-0)
- Fennell, D. A., Ewings, S., Ottensmeier, C., Califano, R., Hanna, G. G., Hill, K., Danson, S., Steele, N., Nye, M., Johnson, L., Lord, J., Middleton, C., Szlosarek, P., Chan, S., Gaba, A., Darlison, L., Wells-Jordan, P., Richards, C., Poile, C., . . . investigators, C. t. (2021). Nivolumab versus placebo in

patients with relapsed malignant mesothelioma (CONFIRM): a multicentre, double-blind, randomised, phase 3 trial. *Lancet Oncol*, 22(11), 1530-1540.

[https://doi.org/10.1016/S1470-2045\(21\)00471-X](https://doi.org/10.1016/S1470-2045(21)00471-X)

Finn, R. (2022). *Primary results from the phase III LEAP-002 study: Lenvatinib plus pembrolizumab versus lenvatinib as first-line (1L) therapy for advanced hepatocellular carcinoma (aHCC)*. <https://oncologypro.esmo.org/meeting-resources/esmo-congress/primary-results-from-the-phase-iii-leap-002-study-lenvatinib-plus-pembrolizumab-versus-lenvatinib-as-first-line-1l-therapy-for-advanced-hepatoce>

Finn, R. S., Ikeda, M., Zhu, A. X., Sung, M. W., Baron, A. D., Kudo, M., Okusaka, T., Kobayashi, M., Kumada, H., Kaneko, S., Pracht, M., Mamontov, K., Meyer, T., Kubota, T., Dutcus, C. E., Saito, K., Siegel, A. B., Dubrovsky, L., Mody, K., & Llovet, J. M. (2020). Phase Ib Study of Lenvatinib Plus Pembrolizumab in Patients With Unresectable Hepatocellular Carcinoma. *J Clin Oncol*, 38(26), 2960-2970. <https://doi.org/10.1200/JCO.20.00808>

G. V. Long, Reinhard Dummer, & li, X. (2016). *Efficacy analysis of MASTERKEY-265 phase 1b study of talimogene laherparepvec (T-VEC) and pembrolizumab (pembro) for unresectable stage IIIB-IV melanoma*. [https://ascopubs.org/doi/abs/10.1200/JCO.2016.34.15\\_suppl.9568](https://ascopubs.org/doi/abs/10.1200/JCO.2016.34.15_suppl.9568)

Gettinger, S., Rizvi, N. A., Chow, L. Q., Borghaei, H., Brahmer, J., Ready, N., Gerber, D. E., Shepherd, F. A., Antonia, S., Goldman, J. W., Juergens, R. A., Laurie, S. A., Nathan, F. E., Shen, Y., Harbison, C. T., & Hellmann, M. D. (2016). Nivolumab Monotherapy for First-Line Treatment of Advanced Non-Small-Cell Lung Cancer. *J Clin Oncol*, 34(25), 2980-2987. <https://doi.org/10.1200/JCO.2016.66.9929>



- Gogas, H., Dreno, B., Larkin, J., Demidov, L., Stroyakovskiy, D., Eroglu, Z., Francesco Ferrucci, P., Pigozzo, J., Rutkowski, P., Mackiewicz, J., Rooney, I., Voulgari, A., Troutman, S., Pitcher, B., Guo, Y., Yan, Y., Castro, M., Mulla, S., Flaherty, K., & Arance, A. (2021). Cobimetinib plus atezolizumab in BRAF(V600) wild-type melanoma: primary results from the randomized phase III IMspire170 study. *Ann Oncol*, *32*(3), 384-394. <https://doi.org/10.1016/j.annonc.2020.12.004>
- Gulley, J. L., Rajan, A., Spigel, D. R., Iannotti, N., Chandler, J., Wong, D. J. L., Leach, J., Edenfield, W. J., Wang, D., Grote, H. J., Heydebreck, A. V., Chin, K., Cuillerot, J. M., & Kelly, K. (2017). Avelumab for patients with previously treated metastatic or recurrent non-small-cell lung cancer (JAVELIN Solid Tumor): dose-expansion cohort of a multicentre, open-label, phase 1b trial. *Lancet Oncol*, *18*(5), 599-610. [https://doi.org/10.1016/S1473-0245\(17\)30240-1](https://doi.org/10.1016/S1473-0245(17)30240-1)
- Gutzmer, R., Stroyakovskiy, D., Gogas, H., Robert, C., Lewis, K., Protsenko, S., Pereira, R. P., Eigentler, T., Rutkowski, P., Demidov, L., Manikhas, G. M., Yan, Y., Huang, K. C., Uyei, A., McNally, V., McArthur, G. A., & Ascierto, P. A. (2020). Atezolizumab, vemurafenib, and cobimetinib as first-line treatment for unresectable advanced BRAF(V600) mutation-positive melanoma (IMspire150): primary analysis of the randomised, double-blind, placebo-controlled, phase 3 trial. *Lancet*, *395*(10240), 1835-1844. [https://doi.org/10.1016/S0140-6736\(20\)30934-X](https://doi.org/10.1016/S0140-6736(20)30934-X)
- Hamanishi, J., Mandai, M., Ikeda, T., Minami, M., Kawaguchi, A., Murayama, T., Kanai, M., Mori, Y., Matsumoto, S., Chikuma, S., Matsumura, N., Abiko, K.,

- Baba, T., Yamaguchi, K., Ueda, A., Hosoe, Y., Morita, S., Yokode, M., Shimizu, A., . . . Konishi, I. (2015). Safety and Antitumor Activity of Anti-PD-1 Antibody, Nivolumab, in Patients With Platinum-Resistant Ovarian Cancer. *J Clin Oncol*, *33*(34), 4015-4022. <https://doi.org/10.1200/JCO.2015.62.3397>
- Hamanishi, J., Takeshima, N., Katsumata, N., Ushijima, K., Kimura, T., Takeuchi, S., Matsumoto, K., Ito, K., Mandai, M., Nakai, H., Sakuragi, N., Watari, H., Takahashi, N., Kato, H., Hasegawa, K., Yonemori, K., Mizuno, M., Takehara, K., Niikura, H., . . . Konishi, I. (2021). Nivolumab Versus Gemcitabine or Pegylated Liposomal Doxorubicin for Patients With Platinum-Resistant Ovarian Cancer: Open-Label, Randomized Trial in Japan (NINJA). *J Clin Oncol*, *39*(33), 3671-3681. <https://doi.org/10.1200/JCO.21.00334>
- Hellmann, M. D., Ciuleanu, T. E., Pluzanski, A., Lee, J. S., Otterson, G. A., Audigier-Valette, C., Minenza, E., Linardou, H., Burgers, S., Salman, P., Borghaei, H., Ramalingam, S. S., Brahmer, J., Reck, M., O'Byrne, K. J., Geese, W. J., Green, G., Chang, H., Szustakowski, J., . . . Paz-Ares, L. (2018). Nivolumab plus Ipilimumab in Lung Cancer with a High Tumor Mutational Burden. *N Engl J Med*, *378*(22), 2093-2104. <https://doi.org/10.1056/NEJMoa1801946>
- Hellmann, M. D., Kim, T. W., Lee, C. B., Goh, B. C., Miller, W. H., Jr., Oh, D. Y., Jamal, R., Chee, C. E., Chow, L. Q. M., Gainor, J. F., Desai, J., Solomon, B. J., Das Thakur, M., Pitcher, B., Foster, P., Hernandez, G., Wongchenko, M. J., Cha, E., Bang, Y. J., . . . Bendell, J. (2019). Phase Ib study of

atezolizumab combined with cobimetinib in patients with solid tumors. *Ann Oncol*, 30(7), 1134-1142. <https://doi.org/10.1093/annonc/mdz113>

Hellmann, M. D., Rizvi, N. A., Goldman, J. W., Gettinger, S. N., Borghaei, H., Brahmer, J. R., Ready, N. E., Gerber, D. E., Chow, L. Q., Juergens, R. A., Shepherd, F. A., Laurie, S. A., Geese, W. J., Agrawal, S., Young, T. C., Li, X., & Antonia, S. J. (2017). Nivolumab plus ipilimumab as first-line treatment for advanced non-small-cell lung cancer (CheckMate 012): results of an open-label, phase 1, multicohort study. *Lancet Oncol*, 18(1), 31-41. [https://doi.org/10.1016/S1470-2045\(16\)30624-6](https://doi.org/10.1016/S1470-2045(16)30624-6)

Herbst, R. S., Giaccone, G., de Marinis, F., Reinmuth, N., Vergnenegre, A., Barrios, C. H., Morise, M., Felip, E., Andric, Z., Geater, S., Ozguroglu, M., Zou, W., Sandler, A., Enquist, I., Komatsubara, K., Deng, Y., Kuriki, H., Wen, X., McClelland, M., . . . Spigel, D. R. (2020). Atezolizumab for First-Line Treatment of PD-L1-Selected Patients with NSCLC. *N Engl J Med*, 383(14), 1328-1339. <https://doi.org/10.1056/NEJMoa1917346>

Hodi, F. S., Chesney, J., Pavlick, A. C., Robert, C., Grossmann, K. F., McDermott, D. F., Linette, G. P., Meyer, N., Giguere, J. K., Agarwala, S. S., Shaheen, M., Ernstoff, M. S., Minor, D. R., Salama, A. K., Taylor, M. H., Ott, P. A., Horak, C., Gagnier, P., Jiang, J., . . . Postow, M. A. (2016). Combined nivolumab and ipilimumab versus ipilimumab alone in patients with advanced melanoma: 2-year overall survival outcomes in a multicentre, randomised, controlled, phase 2 trial. *Lancet Oncol*, 17(11), 1558-1568. [https://doi.org/10.1016/S1470-2045\(16\)30366-7](https://doi.org/10.1016/S1470-2045(16)30366-7)

Huang, J., Xu, B., Mo, H., Zhang, W., Chen, X., Wu, D., Qu, D., Wang, X., Lan, B., Yang, B., Wang, P., Zhang, H., Yang, Q., & Jiao, Y. (2018). Safety, Activity,

and Biomarkers of SHR-1210, an Anti-PD-1 Antibody, for Patients with Advanced Esophageal Carcinoma. *Clin Cancer Res*, 24(6), 1296-1304.

<https://doi.org/10.1158/1078-0432.CCR-17-2439>

Huang, J., Xu, J., Chen, Y., Zhuang, W., Zhang, Y., Chen, Z., Chen, J., Zhang, H., Niu, Z., Fan, Q., Lin, L., Gu, K., Liu, Y., Ba, Y., Miao, Z., Jiang, X., Zeng, M., Chen, J., Fu, Z., . . . Group, E. S. (2020). Camrelizumab versus investigator's choice of chemotherapy as second-line therapy for advanced or metastatic oesophageal squamous cell carcinoma (ESCOR): a multicentre, randomised, open-label, phase 3 study. *Lancet Oncol*, 21(6), 832-842.

[https://doi.org/10.1016/S1470-2045\(20\)30110-8](https://doi.org/10.1016/S1470-2045(20)30110-8)

Janjigian, Y. Y., Bendell, J., Calvo, E., Kim, J. W., Ascierto, P. A., Sharma, P., Ott, P. A., Peltola, K., Jaeger, D., Evans, J., de Braud, F., Chau, I., Harbison, C. T., Dorange, C., Tschaika, M., & Le, D. T. (2018). CheckMate-032 Study: Efficacy and Safety of Nivolumab and Nivolumab Plus Ipilimumab in Patients With Metastatic Esophagogastric Cancer. *J Clin Oncol*, 36(28), 2836-2844. <https://doi.org/10.1200/JCO.2017.76.6212>

Janjigian, Y. Y., & Kawazoe, A. (2021). Combined PD-1 and HER2 blockade for HER2-positive gastric cancer. *Nature*, 600(7890), 727-730.

<https://doi.org/10.1038/s41586-021-04161-3>

Janjigian, Y. Y., Maron, S. B., Chatila, W. K., Millang, B., Chavan, S. S., Alterman, C., Chou, J. F., Segal, M. F., Simmons, M. Z., Momtaz, P., Shcherba, M., Ku, G. Y., Zervoudakis, A., Won, E. S., Kelsen, D. P., Ilson, D. H., Nagy, R. J., Lanman, R. B., Ptashkin, R. N., . . . Hechtman, J. F. (2020). First-line

pembrolizumab and trastuzumab in HER2-positive oesophageal, gastric, or gastro-oesophageal junction cancer: an open-label, single-arm, phase 2 trial. *Lancet Oncol*, 21(6), 821-831. [https://doi.org/10.1016/S1470-2045\(20\)30169-8](https://doi.org/10.1016/S1470-2045(20)30169-8)

Jiang, H., Zheng, Y., Qian, J., Mao, C., Xu, X., Li, N., Xiao, C., Wang, H., Teng, L., Zhou, H., Wang, S., Zhu, D., Peng, B., Shen, L., & Xu, N. (2020). Safety and efficacy of sintilimab combined with oxaliplatin/capecitabine as first-line treatment in patients with locally advanced or metastatic gastric/gastroesophageal junction adenocarcinoma in a phase Ib clinical trial. *BMC Cancer*, 20(1), 760. <https://doi.org/10.1186/s12885-020-07251-z>

Jiang, H., Zheng, Y., Qian, J., Mao, C., Xu, X., Li, N., Xiao, C., Wang, H., Teng, L., Zhou, H., Wang, S., Zhu, D., Sun, T., Yu, Y., Guo, W., & Xu, N. (2021). Efficacy and safety of sintilimab in combination with chemotherapy in previously untreated advanced or metastatic nonsquamous or squamous NSCLC: two cohorts of an open-label, phase 1b study. *Cancer Immunol Immunother*, 70(3), 857-868. <https://doi.org/10.1007/s00262-020-02738-x>

Kang, Y. K., Boku, N., Satoh, T., Ryu, M. H., Chao, Y., Kato, K., Chung, H. C., Chen, J. S., Muro, K., Kang, W. K., Yeh, K. H., Yoshikawa, T., Oh, S. C., Bai, L. Y., Tamura, T., Lee, K. W., Hamamoto, Y., Kim, J. G., Chin, K., . . . Chen, L. T. (2017). Nivolumab in patients with advanced gastric or gastro-oesophageal junction cancer refractory to, or intolerant of, at least two previous chemotherapy regimens (ONO-4538-12, ATTRACTION-2): a randomised, double-blind, placebo-controlled, phase 3 trial. *Lancet*, 390(10111), 2461-2471. [https://doi.org/10.1016/S0140-6736\(17\)31827-5](https://doi.org/10.1016/S0140-6736(17)31827-5)

Kato, K., Cho, B. C., Takahashi, M., Okada, M., Lin, C. Y., Chin, K., Kadowaki, S., Ahn, M. J., Hamamoto, Y., Doki, Y., Yen, C. C., Kubota, Y., Kim, S. B., Hsu,

- C. H., Holtved, E., Xynos, I., Kodani, M., & Kitagawa, Y. (2019). Nivolumab versus chemotherapy in patients with advanced oesophageal squamous cell carcinoma refractory or intolerant to previous chemotherapy (ATTRACTION-3): a multicentre, randomised, open-label, phase 3 trial. *Lancet Oncol*, *20*(11), 1506-1517. [https://doi.org/10.1016/S1470-2045\(19\)30626-6](https://doi.org/10.1016/S1470-2045(19)30626-6)
- Kudo, T., Hamamoto, Y., Kato, K., Ura, T., Kojima, T., Tsushima, T., Hironaka, S., Hara, H., Satoh, T., Iwasa, S., Muro, K., Yasui, H., Minashi, K., Yamaguchi, K., Ohtsu, A., Doki, Y., & Kitagawa, Y. (2017). Nivolumab treatment for oesophageal squamous-cell carcinoma: an open-label, multicentre, phase 2 trial. *Lancet Oncol*, *18*(5), 631-639. [https://doi.org/10.1016/S1470-2045\(17\)30181-X](https://doi.org/10.1016/S1470-2045(17)30181-X)
- Kuruvilla, J., Ramchandren, R., Santoro, A., Paszkiewicz-Kozik, E., Gasiorowski, R., Johnson, N. A., Fogliatto, L. M., Goncalves, I., de Oliveira, J. S. R., Buccheri, V., Perini, G. F., Goldschmidt, N., Kriachok, I., Dickinson, M., Komarnicki, M., McDonald, A., Ozcan, M., Sekiguchi, N., Zhu, Y., . . . investigators, K.-. (2021). Pembrolizumab versus brentuximab vedotin in relapsed or refractory classical Hodgkin lymphoma (KEYNOTE-204): an interim analysis of a multicentre, randomised, open-label, phase 3 study. *Lancet Oncol*, *22*(4), 512-524. [https://doi.org/10.1016/S1470-2045\(21\)00005-X](https://doi.org/10.1016/S1470-2045(21)00005-X)
- Larkin, J., Chiarion-Sileni, V., Gonzalez, R., Grob, J. J., Cowey, C. L., Lao, C. D., Schadendorf, D., Dummer, R., Smylie, M., Rutkowski, P., Ferrucci, P. F., Hill, A., Wagstaff, J., Carlino, M. S., Haanen, J. B., Maio, M., Marquez-Rodas, I., McArthur, G. A., Ascierto, P. A., . . . Wolchok, J. D. (2015).

Combined Nivolumab and Ipilimumab or Monotherapy in Untreated Melanoma. *N Engl J Med*, 373(1), 23-34.

<https://doi.org/10.1056/NEJMoa1504030>

Larkin, J., Minor, D., D'Angelo, S., Neyns, B., Smylie, M., Miller, W. H., Jr., Gutzmer, R., Linette, G., Chmielowski, B., Lao, C. D., Lorigan, P., Grossmann, K., Hassel, J. C., Sznol, M., Daud, A., Sosman, J., Khushalani, N., Schadendorf, D., Hoeller, C., . . . Weber, J. (2018). Overall Survival in Patients With Advanced Melanoma Who Received Nivolumab Versus Investigator's Choice Chemotherapy in CheckMate 037: A Randomized, Controlled, Open-Label Phase III Trial. *J Clin Oncol*, 36(4), 383-390. <https://doi.org/10.1200/JCO.2016.71.8023>

Liu, S. V., Camidge, D. R., Gettinger, S. N., Giaccone, G., Heist, R. S., Hodi, F. S., Ready, N. E., Zhang, W., Wallin, J., Funke, R., Waterkamp, D., Foster, P., Iizuka, K., & Powderly, J. D. (2017). Atezolizumab (atezo) plus platinum-based chemotherapy (chemo) in non-small cell lung cancer (NSCLC): Update from a phase Ib study. *Journal of Clinical Oncology*, 35(15\_suppl), 9092-9092. [https://doi.org/10.1200/JCO.2017.35.15\\_suppl.9092](https://doi.org/10.1200/JCO.2017.35.15_suppl.9092)

Long, G. V., Dummer, R., Hamid, O., Gajewski, T. F., Caglevic, C., Dalle, S., Arance, A., Carlino, M. S., Grob, J. J., Kim, T. M., Demidov, L., Robert, C., Larkin, J., Anderson, J. R., Maleski, J., Jones, M., Diede, S. J., & Mitchell, T. C. (2019). Epcadostat plus pembrolizumab versus placebo plus pembrolizumab in patients with unresectable or metastatic melanoma (ECHO-301/KEYNOTE-252): a phase 3, randomised, double-blind study. *Lancet Oncol*, 20(8), 1083-1097. [https://doi.org/10.1016/S1470-2045\(19\)30274-8](https://doi.org/10.1016/S1470-2045(19)30274-8)

- Makker, V., Colombo, N., Casado Herraiez, A., Santin, A. D., Colomba, E., Miller, D. S., Fujiwara, K., Pignata, S., Baron-Hay, S., Ray-Coquard, I., Shapira-Frommer, R., Ushijima, K., Sakata, J., Yonemori, K., Kim, Y. M., Guerra, E. M., Sanli, U. A., McCormack, M. M., Smith, A. D., . . . Study, K.-I. (2022). Lenvatinib plus Pembrolizumab for Advanced Endometrial Cancer. *N Engl J Med*, *386*(5), 437-448. <https://doi.org/10.1056/NEJMoa2108330>
- Makker, V., Taylor, M. H., Aghajanian, C., Oaknin, A., Mier, J., Cohn, A. L., Romeo, M., Bratos, R., Brose, M. S., DiSimone, C., Messing, M., Stepan, D. E., Dutcus, C. E., Wu, J., Schmidt, E. V., Orlowski, R., Sachdev, P., Shumaker, R., & Casado Herraiez, A. (2020). Lenvatinib Plus Pembrolizumab in Patients With Advanced Endometrial Cancer. *J Clin Oncol*, *38*(26), 2981-2992. <https://doi.org/10.1200/JCO.19.02627>
- Mateos, M. V., Blacklock, H., Schjesvold, F., Oriol, A., Simpson, D., George, A., Goldschmidt, H., Larocca, A., Chanan-Khan, A., Sherbenou, D., Avivi, I., Benyamini, N., Iida, S., Matsumoto, M., Suzuki, K., Ribrag, V., Usmani, S. Z., Jagannath, S., Ocio, E. M., . . . Investigators, K.-. (2019). Pembrolizumab plus pomalidomide and dexamethasone for patients with relapsed or refractory multiple myeloma (KEYNOTE-183): a randomised, open-label, phase 3 trial. *Lancet Haematol*, *6*(9), e459-e469. [https://doi.org/10.1016/S2352-3026\(19\)30110-3](https://doi.org/10.1016/S2352-3026(19)30110-3)
- McDermott, D. F., Huseni, M. A., Atkins, M. B., Motzer, R. J., Rini, B. I., Escudier, B., Fong, L., Joseph, R. W., Pal, S. K., Reeves, J. A., Sznol, M., Hainsworth, J., Rathmell, W. K., Stadler, W. M., Hutson, T., Gore, M. E., Ravaud, A., Bracarda, S., Suarez, C., . . . Powles, T. (2018). Clinical activity and molecular correlates of response to atezolizumab alone or in combination with bevacizumab versus sunitinib in renal cell carcinoma. *Nat Med*, *24*(6),



749-757. <https://doi.org/10.1038/s41591-018-0053-3>

- Mitchell, T. C., Hamid, O., Smith, D. C., Bauer, T. M., Wasser, J. S., Olszanski, A. J., Luke, J. J., Balmanoukian, A. S., Schmidt, E. V., Zhao, Y., Gong, X., Maleski, J., Leopold, L., & Gajewski, T. F. (2018). Epacadostat Plus Pembrolizumab in Patients With Advanced Solid Tumors: Phase I Results From a Multicenter, Open-Label Phase I/II Trial (ECHO-202/KEYNOTE-037). *J Clin Oncol*, *36*(32), 3223-3230. <https://doi.org/10.1200/JCO.2018.78.9602>
- Motzer, R. J., Escudier, B., McDermott, D. F., George, S., Hammers, H. J., Srinivas, S., Tykodi, S. S., Sosman, J. A., Procopio, G., Plimack, E. R., Castellano, D., Choueiri, T. K., Gurney, H., Donskov, F., Bono, P., Wagstaff, J., Gaurer, T. C., Ueda, T., Tomita, Y., . . . CheckMate, I. (2015). Nivolumab versus Everolimus in Advanced Renal-Cell Carcinoma. *N Engl J Med*, *373*(19), 1803-1813. <https://doi.org/10.1056/NEJMoa1510665>
- Motzer, R. J., Penkov, K., Haanen, J., Rini, B., Albiges, L., Campbell, M. T., Venugopal, B., Kollmannsberger, C., Negrier, S., Uemura, M., Lee, J. L., Vasiliev, A., Miller, W. H., Jr., Gurney, H., Schmidinger, M., Larkin, J., Atkins, M. B., Bedke, J., Alekseev, B., . . . Choueiri, T. K. (2019). Avelumab plus Axitinib versus Sunitinib for Advanced Renal-Cell Carcinoma. *N Engl J Med*, *380*(12), 1103-1115. <https://doi.org/10.1056/NEJMoa1816047>
- Motzer, R. J., Rini, B. I., McDermott, D. F., Redman, B. G., Kuzel, T. M., Harrison, M. R., Vaishampayan, U. N., Drabkin, H. A., George, S., Logan, T. F., Margolin, K. A., Plimack, E. R., Lambert, A. M., Waxman, I. M., & Hammers, H. J. (2015). Nivolumab for Metastatic Renal Cell Carcinoma: Results of a Randomized Phase II Trial. *J Clin Oncol*, *33*(13), 1430-1437. <https://doi.org/10.1200/JCO.2014.59.0703>

Nanda, R., Chow, L. Q., Dees, E. C., Berger, R., Gupta, S., Geva, R., Puzstai, L., Pathiraja, K., Aktan, G., Cheng, J. D., Karantza, V., & Buisseret, L. (2016).

Pembrolizumab in Patients With Advanced Triple-Negative Breast Cancer: Phase Ib KEYNOTE-012 Study. *J Clin Oncol*, *34*(21), 2460-2467.

<https://doi.org/10.1200/JCO.2015.64.8931>

Nishio, M., Barlesi, F., West, H., Ball, S., Bordoni, R., Cobo, M., Longeras, P. D., Goldschmidt, J., Jr., Novello, S., Orlandi, F., Sanborn, R. E., Szalai, Z., Ursol,

G., Mendus, D., Wang, L., Wen, X., McClelland, M., Hoang, T., Phan, S., & Socinski, M. A. (2021). Atezolizumab Plus Chemotherapy for First-Line

Treatment of Nonsquamous NSCLC: Results From the Randomized Phase 3 IMpower132 Trial. *J Thorac Oncol*, *16*(4), 653-664.

<https://doi.org/10.1016/j.jtho.2020.11.025>

Nizar Tannir, M. N. F., N. Agarwal, S.K. Pal, D. Cho, D.J. George, W. Hong, L. Tang, A. Qureshi, M.A. Tagliaferri, J. Zalevsky, K.D. Penkov. (2022).

Bempegaldesleukin (BEMPEG) plus nivolumab (NIVO) compared to the investigator's choice of sunitinib or cabozantinib in previously untreated

advanced renal cell carcinoma (RCC): Results from a phase III randomized study (PIVOT-09). [https://oncologypro.esmo.org/meeting-](https://oncologypro.esmo.org/meeting-resources/esmo-congress/bempegaldesleukin-bempeg-plus-nivolumab-nivo-compared-to-the-investigator-s-choice-of-sunitinib-or-cabozantinib-in-previously-untreated-advance)

[resources/esmo-congress/bempegaldesleukin-bempeg-plus-nivolumab-nivo-compared-to-the-investigator-s-choice-of-sunitinib-or-cabozantinib-in-](https://oncologypro.esmo.org/meeting-resources/esmo-congress/bempegaldesleukin-bempeg-plus-nivolumab-nivo-compared-to-the-investigator-s-choice-of-sunitinib-or-cabozantinib-in-previously-untreated-advance)

[previously-untreated-advance](https://oncologypro.esmo.org/meeting-resources/esmo-congress/bempegaldesleukin-bempeg-plus-nivolumab-nivo-compared-to-the-investigator-s-choice-of-sunitinib-or-cabozantinib-in-previously-untreated-advance)

Oh D-Y, e. a. (2022). *Durvalumab plus cisplatin/gemcitabine is now standard of care for patients with advanced/metastatic biliary tract cancer.*

<https://dailyreporter.esmo.org/esmo-congress-2022/upper-gi-tumours/durvalumab-plus-cisplatin-gemcitabine-is-now-standard-of-care-for-patients-with-advanced-metastatic-biliary-tract-cancer>

Oh, D. Y., Lee, K. H., Lee, D. W., Yoon, J., Kim, T. Y., Bang, J. H., Nam, A. R., Oh, K. S., Kim, J. M., Lee, Y., Guthrie, V., McCoon, P., Li, W., Wu, S., Zhang, Q., Rebeatto, M. C., & Kim, J. W. (2022). Gemcitabine and cisplatin plus durvalumab with or without tremelimumab in chemotherapy-naive patients with advanced biliary tract cancer: an open-label, single-centre, phase 2 study. *Lancet Gastroenterol Hepatol*, 7(6), 522-532. [https://doi.org/10.1016/S2468-1253\(22\)00043-7](https://doi.org/10.1016/S2468-1253(22)00043-7)

Okada, M., Kijima, T., Aoe, K., Kato, T., Fujimoto, N., Nakagawa, K., Takeda, Y., Hida, T., Kanai, K., Imamura, F., Oizumi, S., Takahashi, T., Takenoyama, M., Tanaka, H., Hirano, J., Namba, Y., & Ohe, Y. (2019). Clinical Efficacy and Safety of Nivolumab: Results of a Multicenter, Open-label, Single-arm, Japanese Phase II study in Malignant Pleural Mesothelioma (MERIT). *Clin Cancer Res*, 25(18), 5485-5492. <https://doi.org/10.1158/1078-0432.CCR-19-0103>

Omuro, A., Vlahovic, G., Lim, M., Sahebjam, S., Baehring, J., Cloughesy, T., Voloschin, A., Ramkissoon, S. H., Ligon, K. L., Latek, R., Zwirter, R., Strauss, L., Paliwal, P., Harbison, C. T., Reardon, D. A., & Sampson, J. H. (2018). Nivolumab with or without ipilimumab in patients with recurrent glioblastoma: results from exploratory phase I cohorts of CheckMate 143. *Neuro Oncol*, 20(5), 674-686. <https://doi.org/10.1093/neuonc/nox208>

- Peters, S., Gettinger, S., Johnson, M. L., Janne, P. A., Garassino, M. C., Christoph, D., Toh, C. K., Rizvi, N. A., Chaft, J. E., Carcereny Costa, E., Patel, J. D., Chow, L. Q. M., Koczywas, M., Ho, C., Fruh, M., van den Heuvel, M., Rothenstein, J., Reck, M., Paz-Ares, L., . . . Felip, E. (2017). Phase II Trial of Atezolizumab As First-Line or Subsequent Therapy for Patients With Programmed Death-Ligand 1-Selected Advanced Non-Small-Cell Lung Cancer (BIRCH). *J Clin Oncol*, *35*(24), 2781-2789. <https://doi.org/10.1200/JCO.2016.71.9476>
- Planchard, D., Reinmuth, N., Orlov, S., Fischer, J. R., Sugawara, S., Mandziuk, S., Marquez-Medina, D., Novello, S., Takeda, Y., Soo, R., Park, K., McCleod, M., Geater, S. L., Powell, M., May, R., Scheuring, U., Stockman, P., & Kowalski, D. (2020). ARCTIC: durvalumab with or without tremelimumab as third-line or later treatment of metastatic non-small-cell lung cancer. *Ann Oncol*, *31*(5), 609-618. <https://doi.org/10.1016/j.annonc.2020.02.006>
- Powles, T., Duran, I., van der Heijden, M. S., Loriot, Y., Vogelzang, N. J., De Giorgi, U., Oudard, S., Retz, M. M., Castellano, D., Bamias, A., Flechon, A., Gravis, G., Hussain, S., Takano, T., Leng, N., Kadel, E. E., 3rd, Banchereau, R., Hegde, P. S., Mariathasan, S., . . . Ravaud, A. (2018). Atezolizumab versus chemotherapy in patients with platinum-treated locally advanced or metastatic urothelial carcinoma (IMvigor211): a multicentre, open-label, phase 3 randomised controlled trial. *Lancet*, *391*(10122), 748-757. [https://doi.org/10.1016/S0140-6736\(17\)33297-X](https://doi.org/10.1016/S0140-6736(17)33297-X)
- Pujade-Lauraine, E., Fujiwara, K., Ledermann, J. A., Oza, A. M., Kristeleit, R., Ray-Coquard, I. L., Richardson, G. E., Sessa, C., Yonemori, K., Banerjee, S., Leary, A., Tinker, A. V., Jung, K. H., Madry, R., Park, S. Y., Anderson, C. K., Zohren, F., Stewart, R. A., Wei, C., . . . Monk, B. J. (2021). Avelumab

alone or in combination with chemotherapy versus chemotherapy alone in platinum-resistant or platinum-refractory ovarian cancer (JAVELIN Ovarian 200): an open-label, three-arm, randomised, phase 3 study. *Lancet Oncol*, 22(7), 1034-1046. [https://doi.org/10.1016/S1470-2045\(21\)00216-3](https://doi.org/10.1016/S1470-2045(21)00216-3)

Qin, S., L.S. Chan, S. Gu, Y. Bai, Z. Ren, Lin , , X., Z. Chen, W. Jia, Y. Jin, Y. Guo, A.V. Sultanbaev, M. Pazgan-Simon, M. Pisetska, X. Liang, C. Chen, Z.

Nie, L. Wang, A. Cheng, A. Kaseb, & Vogel, A. (2022). *Camrelizumab (C) plus rivoceranib (R) vs. sorafenib (S) as first-line therapy for unresectable hepatocellular carcinoma (uHCC): A randomized, phase III trial.* <https://oncologypro.esmo.org/meeting-resources/esmo-congress/camrelizumab-c-plus-rivoceranib-r-vs.-sorafenib-s-as-first-line-therapy-for-unresectable-hepatocellular-carcinoma-uhcc-a-randomized-phase>

Reardon, D. A., Brandes, A. A., Omuro, A., Mulholland, P., Lim, M., Wick, A., Baehring, J., Ahluwalia, M. S., Roth, P., Bahr, O., Phuphanich, S., Sepulveda, J.

M., De Souza, P., Sahebjam, S., Carleton, M., Tatsuoka, K., Taitt, C., Zwirtes, R., Sampson, J., & Weller, M. (2020). Effect of Nivolumab vs Bevacizumab in Patients With Recurrent Glioblastoma: The CheckMate 143 Phase 3 Randomized Clinical Trial. *JAMA Oncol*, 6(7), 1003-1010. <https://doi.org/10.1001/jamaoncol.2020.1024>

Ren, Z., Xu, J., Bai, Y., Xu, A., Cang, S., Du, C., Li, Q., Lu, Y., Chen, Y., Guo, Y., Chen, Z., Liu, B., Jia, W., Wu, J., Wang, J., Shao, G., Zhang, B., Shan, Y.,

Meng, Z., . . . group, O.-s. (2021). Sintilimab plus a bevacizumab biosimilar (IBI305) versus sorafenib in unresectable hepatocellular carcinoma (ORIENT-32): a randomised, open-label, phase 2-3 study. *Lancet Oncol*, 22(7), 977-990. [https://doi.org/10.1016/S1470-2045\(21\)00252-7](https://doi.org/10.1016/S1470-2045(21)00252-7)

Rini, B. I., Plimack, E. R., Stus, V., Gafanov, R., Hawkins, R., Nosov, D., Pouliot, F., Alekseev, B., Soulieres, D., Melichar, B., Vynnychenko, I., Kryzhanivska, A., Bondarenko, I., Azevedo, S. J., Borchiellini, D., Szczylik, C., Markus, M., McDermott, R. S., Bedke, J., . . . Investigators, K.-. (2019). Pembrolizumab plus Axitinib versus Sunitinib for Advanced Renal-Cell Carcinoma. *N Engl J Med*, *380*(12), 1116-1127.

<https://doi.org/10.1056/NEJMoa1816714>

Rini, B. I., Powles, T., Atkins, M. B., Escudier, B., McDermott, D. F., Suarez, C., Bracarda, S., Stadler, W. M., Donskov, F., Lee, J. L., Hawkins, R., Ravaud, A., Alekseev, B., Staehler, M., Uemura, M., De Giorgi, U., Mellado, B., Porta, C., Melichar, B., . . . Group, I. M. S. (2019). Atezolizumab plus bevacizumab versus sunitinib in patients with previously untreated metastatic renal cell carcinoma (IMmotion151): a multicentre, open-label, phase 3, randomised controlled trial. *Lancet*, *393*(10189), 2404-2415. [https://doi.org/10.1016/S0140-6736\(19\)30723-8](https://doi.org/10.1016/S0140-6736(19)30723-8)

Rischin, D., Gil-Martin, M., Gonzalez-Martin, A., Brana, I., Hou, J. Y., Cho, D., Falchook, G. S., Formenti, S., Jabbour, S., Moore, K., Naing, A., Papadopoulos, K. P., Baranda, J., Fury, W., Feng, M., Stankevich, E., Li, J., Yama-Dang, N. A., Yoo, S. Y., . . . Fury, M. G. (2020). PD-1 blockade in recurrent or metastatic cervical cancer: Data from cemiplimab phase I expansion cohorts and characterization of PD-L1 expression in cervical cancer. *Gynecol Oncol*, *159*(2), 322-328. <https://doi.org/10.1016/j.ygyno.2020.08.026>

Rittmeyer, A., Barlesi, F., Waterkamp, D., Park, K., Ciardiello, F., von Pawel, J., Gadgeel, S. M., Hida, T., Kowalski, D. M., Dols, M. C., Cortinovis, D. L.,

- Leach, J., Polikoff, J., Barrios, C., Kabbinavar, F., Frontera, O. A., De Marinis, F., Turna, H., Lee, J. S., . . . Group, O. A. K. S. (2017). Atezolizumab versus docetaxel in patients with previously treated non-small-cell lung cancer (OAK): a phase 3, open-label, multicentre randomised controlled trial. *Lancet*, *389*(10066), 255-265. [https://doi.org/10.1016/S0140-6736\(16\)32517-X](https://doi.org/10.1016/S0140-6736(16)32517-X)
- Rizvi, N. A., Mazieres, J., Planchard, D., Stinchcombe, T. E., Dy, G. K., Antonia, S. J., Horn, L., Lena, H., Minenza, E., Mennequier, B., Otterson, G. A., Campos, L. T., Gandara, D. R., Levy, B. P., Nair, S. G., Zalcman, G., Wolf, J., Souquet, P. J., Baldini, E., . . . Ramalingam, S. S. (2015). Activity and safety of nivolumab, an anti-PD-1 immune checkpoint inhibitor, for patients with advanced, refractory squamous non-small-cell lung cancer (CheckMate 063): a phase 2, single-arm trial. *Lancet Oncol*, *16*(3), 257-265. [https://doi.org/10.1016/S1470-2045\(15\)70054-9](https://doi.org/10.1016/S1470-2045(15)70054-9)
- Rosenberg, J. E., Hoffman-Censits, J., Powles, T., van der Heijden, M. S., Balar, A. V., Necchi, A., Dawson, N., O'Donnell, P. H., Balmanoukian, A., Loriot, Y., Srinivas, S., Retz, M. M., Grivas, P., Joseph, R. W., Galsky, M. D., Fleming, M. T., Petrylak, D. P., Perez-Gracia, J. L., Burris, H. A., . . . Dreicer, R. (2016). Atezolizumab in patients with locally advanced and metastatic urothelial carcinoma who have progressed following treatment with platinum-based chemotherapy: a single-arm, multicentre, phase 2 trial. *Lancet*, *387*(10031), 1909-1920. [https://doi.org/10.1016/S0140-6736\(16\)00561-4](https://doi.org/10.1016/S0140-6736(16)00561-4)
- Schmid, P., Adams, S., Rugo, H. S., Schneeweiss, A., Barrios, C. H., Iwata, H., Dieras, V., Hegg, R., Im, S. A., Shaw Wright, G., Henschel, V., Molinero, L., Chui, S. Y., Funke, R., Husain, A., Winer, E. P., Loi, S., Emens, L. A., & Investigators, I. M. T. (2018). Atezolizumab and Nab-Paclitaxel in Advanced

Triple-Negative Breast Cancer. *N Engl J Med*, 379(22), 2108-2121. <https://doi.org/10.1056/NEJMoa1809615>

Seiwert, T. Y., Burtneß, B., Mehra, R., Weiss, J., Berger, R., Eder, J. P., Heath, K., McClanahan, T., Lunceford, J., Gause, C., Cheng, J. D., & Chow, L. Q.

(2016). Safety and clinical activity of pembrolizumab for treatment of recurrent or metastatic squamous cell carcinoma of the head and neck

(KEYNOTE-012): an open-label, multicentre, phase 1b trial. *Lancet Oncol*, 17(7), 956-965. [https://doi.org/10.1016/S1470-2045\(16\)30066-3](https://doi.org/10.1016/S1470-2045(16)30066-3)

Shitara, K., Van Cutsem, E., Bang, Y. J., Fuchs, C., Wyrwicz, L., Lee, K. W., Kudaba, I., Garrido, M., Chung, H. C., Lee, J., Castro, H. R., Mansoor, W.,

Braghiroli, M. I., Karaseva, N., Caglevic, C., Villanueva, L., Goekkurt, E., Satake, H., Enzinger, P., . . . Tabernero, J. (2020). Efficacy and Safety of

Pembrolizumab or Pembrolizumab Plus Chemotherapy vs Chemotherapy Alone for Patients With First-line, Advanced Gastric Cancer: The

KEYNOTE-062 Phase 3 Randomized Clinical Trial. *JAMA Oncol*, 6(10), 1571-1580. <https://doi.org/10.1001/jamaoncol.2020.3370>

Sullivan, R. J., Hamid, O., Gonzalez, R., Infante, J. R., Patel, M. R., Hodi, F. S., Lewis, K. D., Tawbi, H. A., Hernandez, G., Wongchenko, M. J., Chang, Y.,

Roberts, L., Ballinger, M., Yan, Y., Cha, E., & Hwu, P. (2019). Atezolizumab plus cobimetinib and vemurafenib in BRAF-mutated melanoma patients.

*Nat Med*, 25(6), 929-935. <https://doi.org/10.1038/s41591-019-0474-7>

Tannir, N. M., Cho, D. C., Diab, A., Sznol, M., Bilen, M. A., Balar, A. V., Grignani, G., Puente, E., Tang, L., Chien, D., Hoch, U., Choudhury, A., Yu, D., Currie,

S. L., Tagliaferri, M. A., Zalevsky, J., Siefker-Radtke, A. O., & Hurwitz, M. E. (2022). Bempegaldesleukin plus nivolumab in first-line renal cell



- carcinoma: results from the PIVOT-02 study. *J Immunother Cancer*, 10(4). <https://doi.org/10.1136/jitc-2021-004419>
- Taylor, M. H., Lee, C. H., Makker, V., Rasco, D., Dutcus, C. E., Wu, J., Stepan, D. E., Shumaker, R. C., & Motzer, R. J. (2020). Phase IB/II Trial of Lenvatinib Plus Pembrolizumab in Patients With Advanced Renal Cell Carcinoma, Endometrial Cancer, and Other Selected Advanced Solid Tumors. *J Clin Oncol*, 38(11), 1154-1163. <https://doi.org/10.1200/JCO.19.01598>
- Tewari, K. S., Monk, B. J., Vergote, I., Miller, A., de Melo, A. C., Kim, H. S., Kim, Y. M., Lisysanskaya, A., Samouelian, V., Lorusso, D., Damian, F., Chang, C. L., Gotovkin, E. A., Takahashi, S., Ramone, D., Pikiel, J., Mackowiak-Matejczyk, B., Guerra Alia, E. M., Colombo, N., . . . En-Cx, E. P. (2022). Survival with Cemiplimab in Recurrent Cervical Cancer. *N Engl J Med*, 386(6), 544-555. <https://doi.org/10.1056/NEJMoa2112187>
- Topalian, S. L., Hodi, F. S., Brahmer, J. R., Gettinger, S. N., Smith, D. C., McDermott, D. F., Powderly, J. D., Carvajal, R. D., Sosman, J. A., Atkins, M. B., Leming, P. D., Spigel, D. R., Antonia, S. J., Horn, L., Drake, C. G., Pardoll, D. M., Chen, L., Sharfman, W. H., Anders, R. A., . . . Sznol, M. (2012). Safety, activity, and immune correlates of anti-PD-1 antibody in cancer. *N Engl J Med*, 366(26), 2443-2454. <https://doi.org/10.1056/NEJMoa1200690>
- Winer, E. P., Lipatov, O., Im, S. A., Goncalves, A., Munoz-Couselo, E., Lee, K. S., Schmid, P., Tamura, K., Testa, L., Witzel, I., Ohtani, S., Turner, N., Zambelli, S., Harbeck, N., Andre, F., Dent, R., Zhou, X., Karantza, V., Mejia, J., . . . investigators, K.-. (2021). Pembrolizumab versus investigator-choice chemotherapy for metastatic triple-negative breast cancer (KEYNOTE-119): a randomised, open-label, phase 3 trial. *Lancet Oncol*, 22(4), 499-

511. [https://doi.org/10.1016/S1470-2045\(20\)30754-3](https://doi.org/10.1016/S1470-2045(20)30754-3)

Xu, J., Jiang, H., Pan, Y., Gu, K., Cang, S., Han, L., Shu, Y., Li, J., Zhao, J., Pan, H., Luo, S., Qin, Y., Guo, Q., Bai, Y., Ling, Y., Guo, Y., Li, Z., Liu, Y., Wang, Y., & Zhou, H. (2021). LBA53 Sintilimab plus chemotherapy (chemo) versus chemo as first-line treatment for advanced gastric or gastroesophageal junction (G/GEJ) adenocarcinoma (ORIENT-16): First results of a randomized, double-blind, phase III study. *Annals of Oncology*, 32.

<https://doi.org/10.1016/j.annonc.2021.08.2133>

Xu, J., Shen, J., Gu, S., Zhang, Y., Wu, L., Wu, J., Shao, G., Zhang, Y., Xu, L., Yin, T., Liu, J., Ren, Z., Xiong, J., Mao, X., Zhang, L., Yang, J., Li, L., Chen, X., Wang, Z., . . . Wang, Q. (2021). Camrelizumab in Combination with Apatinib in Patients with Advanced Hepatocellular Carcinoma (RESCUE): A Nonrandomized, Open-label, Phase II Trial. *Clin Cancer Res*, 27(4), 1003-1011. <https://doi.org/10.1158/1078-0432.CCR-20-2571>

Y.Loriot, Arjun Vasant Balar, & Ronald De Wit, J. A. G., Petros Grivas, Nobuaki Matsubara, Blanca Homet Moreno, Eric Sbar, Xieyang Calvin Jia, Corina E. Dutcus, Arlene O. Siefker-Radtke. (2022). *Phase III study of first-line pembrolizumab (pembro) plus lenvatinib (len) in patients (pts) with advanced urothelial carcinoma (UC) ineligible for platinum-based chemotherapy: LEAP-011*. <https://meetings.asco.org/abstracts-presentations/184080>

Yang, Y., Wang, Z., Fang, J., Yu, Q., Han, B., Cang, S., Chen, G., Mei, X., Yang, Z., Ma, R., Bi, M., Ren, X., Zhou, J., Li, B., Song, Y., Feng, J., Li, J., He, Z., Zhou, R., . . . Zhang, L. (2020). Efficacy and Safety of Sintilimab Plus Pemetrexed and Platinum as First-Line Treatment for Locally Advanced or

Metastatic Nonsquamous NSCLC: a Randomized, Double-Blind, Phase 3 Study (Oncology pRogram by InnovENT anti-PD-1-11). *J Thorac Oncol*, 15(10), 1636-1646. <https://doi.org/10.1016/j.jtho.2020.07.014>

Zhou, C., Wu, L., Fan, Y., Wang, Z., Liu, L., Chen, G., Zhang, L., Huang, D., Cang, S., Yang, Z., Zhou, J., Zhou, C., Li, B., Li, J., Fan, M., Cui, J., Li, Y., Zhao, H., Fang, J., . . . Zhang, W. (2021). Sintilimab Plus Platinum and Gemcitabine as First-Line Treatment for Advanced or Metastatic Squamous NSCLC: Results From a Randomized, Double-Blind, Phase 3 Trial (ORIENT-12). *J Thorac Oncol*, 16(9), 1501-1511. <https://doi.org/10.1016/j.jtho.2021.04.011>
