# Supplementary figures and images for: Comparison of efficacy discrepancy between early-phase clinical trials and phase III trials of PD-1/PD-L1 inhibitors
Source: HighWire-hosted journal article supplement (doi:10.1136/jitc-2023-007959), 2024-01-01

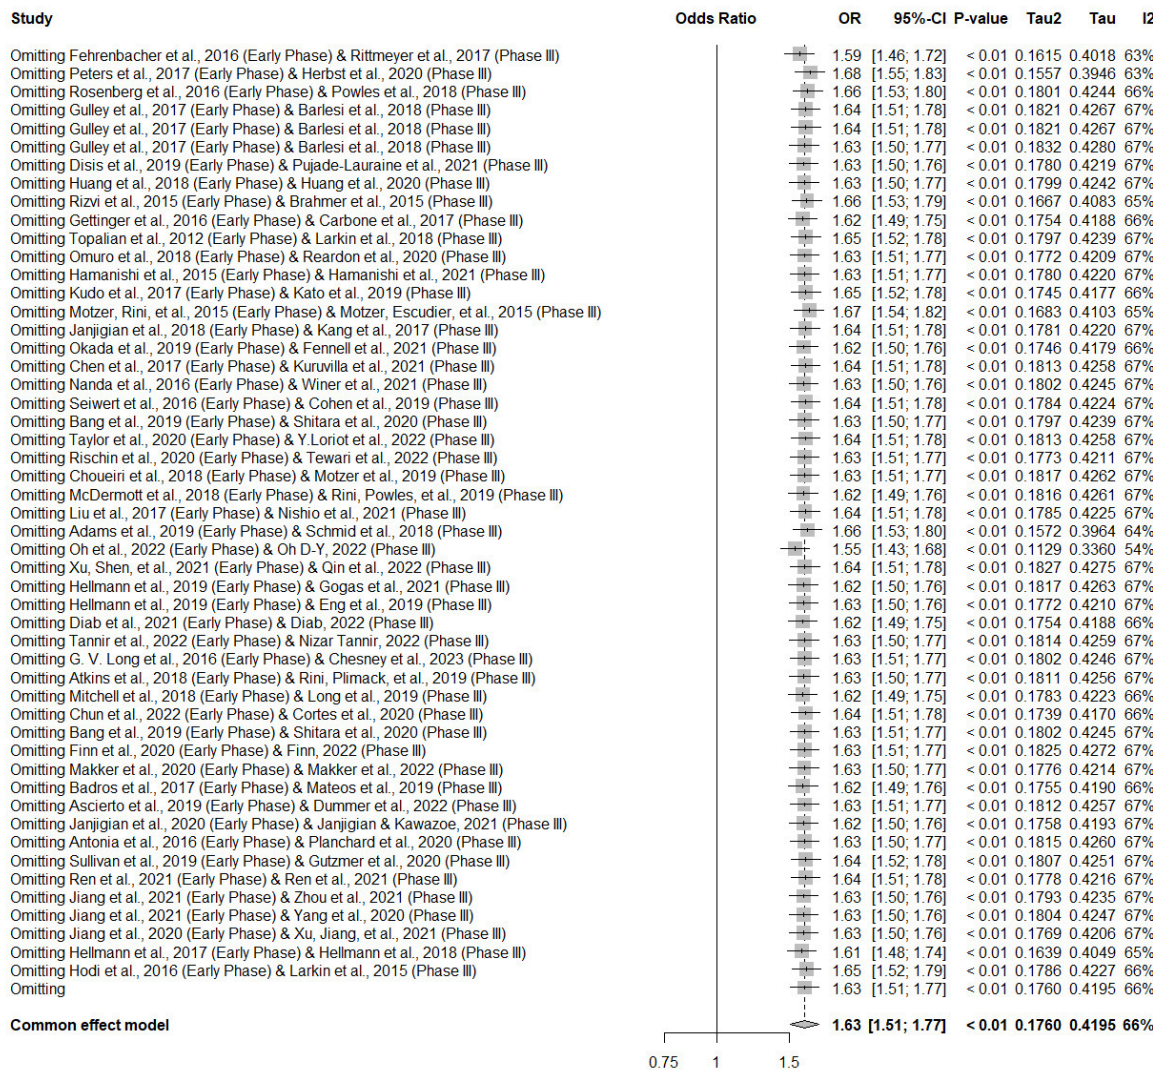

Supplement: jitc-2023-007959supp002_data_supplement.pdf [file jitc-2023-007959supp002_data_supplement.pdf]

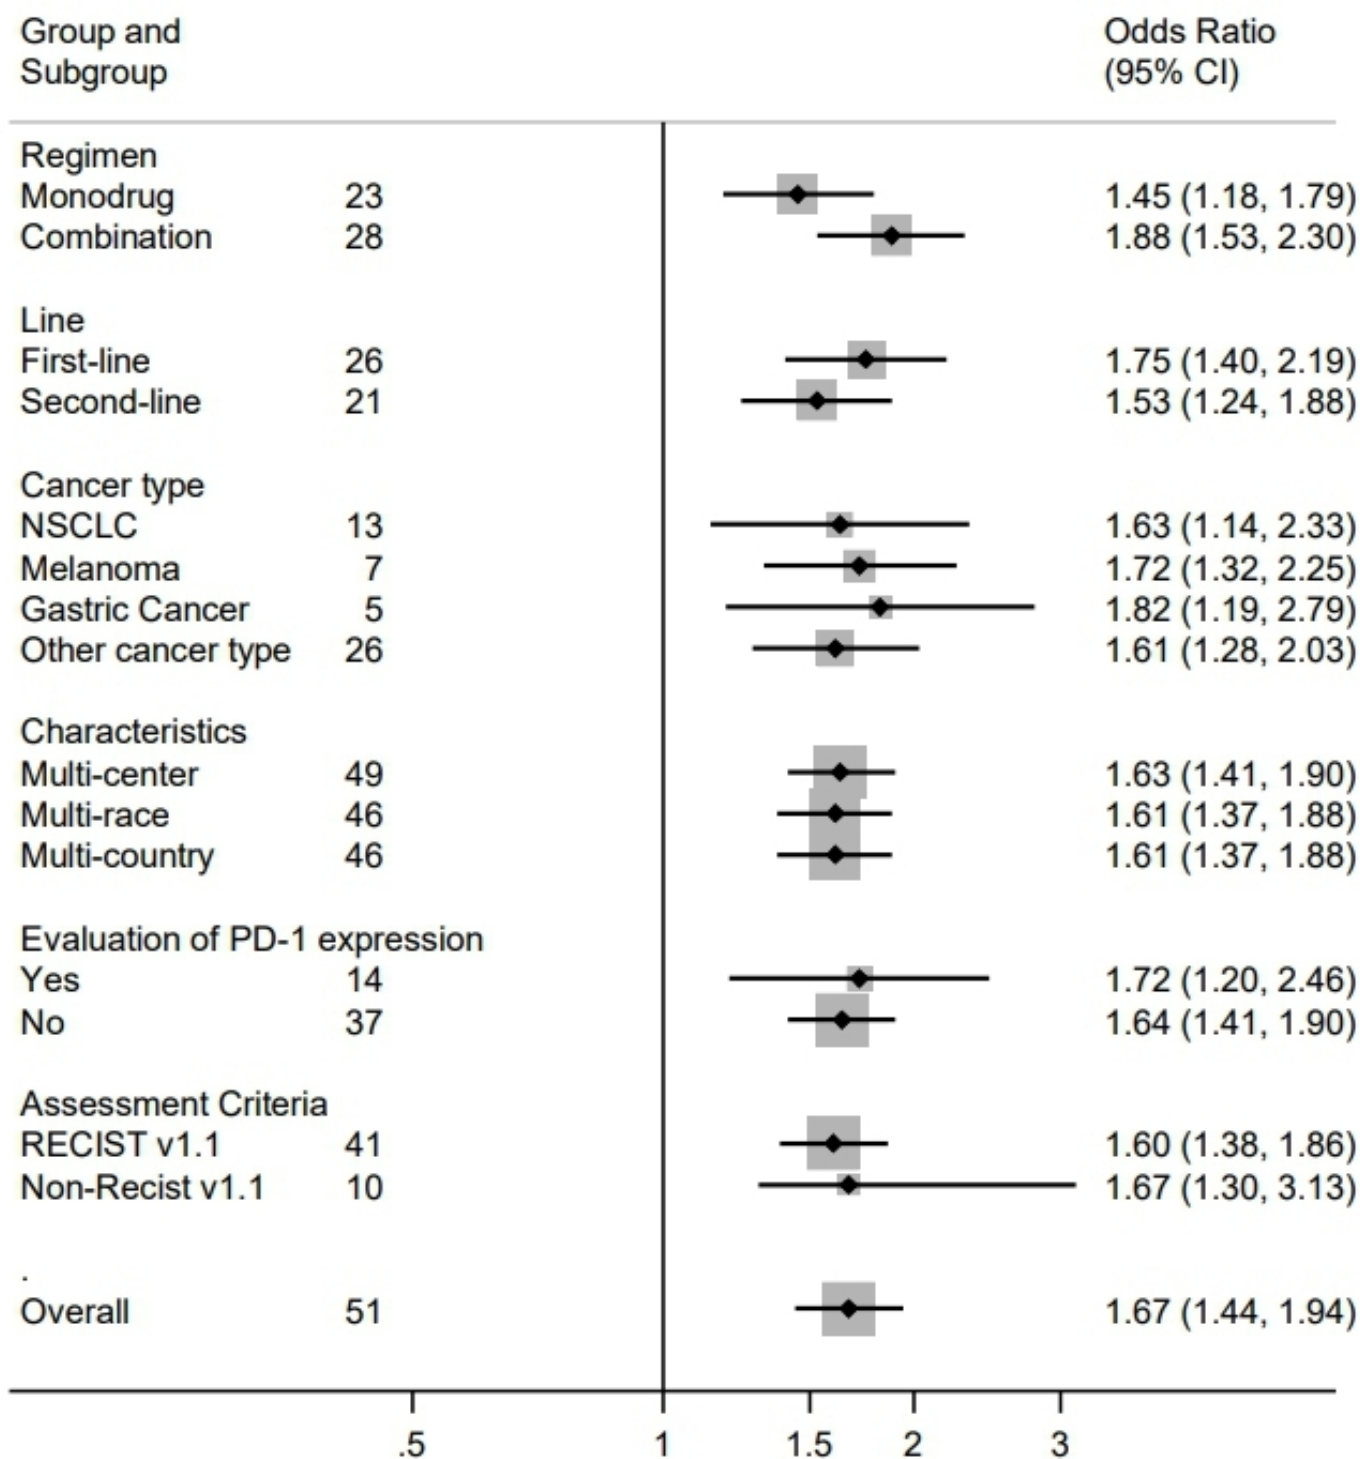

Supplement: jitc-2023-007959supp003_data_supplement.pdf [file jitc-2023-007959supp003_data_supplement.pdf]
